47 1900 Coffey Rd.  
48 Columbus, OH 43210  
49 [hale.502@osu.edu](mailto:hale.502@osu.edu)  
50

51 **Gut microbiota and age shape susceptibility to clostridial enteritis in lorikeets under**  
52 **human care**  
53

54 David Minich<sup>1\*</sup>, Christopher Madden<sup>1\*</sup>, Mauricio A. Navarro<sup>2,3</sup>, Leo Glowacki<sup>4</sup>, Kristen French-  
55 Kim<sup>1</sup>, Willow Chan<sup>5</sup>, Morgan V. Evans<sup>1,6</sup>, Kilmer Soares<sup>1,7</sup>, Ryan Mrofchak<sup>1</sup>, Rushil Madan<sup>1</sup>,  
56 Gregory A. Ballash<sup>1</sup>, Krista LaPerle<sup>1,8</sup>, Subhadeep Paul<sup>4</sup>, Yael Vodovotz<sup>5</sup>, Francisco A. Uzal<sup>2</sup>,  
57 Margaret Martinez<sup>1,9</sup>, Jennifer Hausmann<sup>10</sup>, Randall E. Junge<sup>11</sup>, Vanessa L. Hale<sup>1</sup>  
58

59 <sup>1</sup>Ohio State University College of Veterinary Medicine, Columbus, OH, USA

60 <sup>2</sup>California Animal Health & Food Safety Lab, University of California, Davis, San Bernardino,  
61 CA, USA

62 <sup>3</sup>Instituto de Patología Animal, Facultad de Ciencias Veterinarias, Universidad Austral de Chile,  
63 Chile

64 <sup>4</sup>Ohio State University College of Arts and Sciences, Columbus, OH, USA

65 <sup>5</sup>Ohio State University College of Food, Agricultural, and Environmental Sciences, Columbus,  
66 OH, USA

67 <sup>6</sup>Ohio State University College of Public Health, Columbus, OH, USA

68 <sup>7</sup>Department of Animal Science, College of Agricultural Sciences (CCA), Federal University of  
69 Paraíba (UFPB), Areia, PB, Brazil

70 <sup>8</sup>Ohio State University Comparative Pathology & Digital Imaging Shared Resource, Columbus,  
71 OH, USA

72 <sup>9</sup>The Marine Mammal Center, Sausalito, CA, USA

73 <sup>10</sup>Denver Zoo, Denver, CO, USA

74 <sup>11</sup>Columbus Zoo and Aquarium, Columbus, OH, USA  
75

76 \*contributed equally  
77

78 **Abstract**

79 *Background*

80 Enteritis is a common cause of morbidity and mortality in lorikeets that can be challenging to  
81 diagnose and treat. In this study, we examine gut microbiota in two lorikeet flocks with enteritis  
82 (Columbus Zoo and Aquarium – CZA; Denver Zoo - DZ). Since 2012, the CZA flock has  
83 experienced repeated outbreaks of enteritis despite extensive diet, husbandry, and clinical  
84 modifications. In 2018, both CZA and DZ observed a spike in enteritis. Recent research has  
85 revealed that the gut microbiota can influence susceptibility to enteropathogens. We  
86 hypothesized that a dysbiosis, or alteration in the gut microbial community, was making some

87 lorikeets more susceptible to enteritis, and our goal was to characterize this dysbiosis and  
88 determine the features that predicted susceptibility.

### 89 *Results*

90 We employed 16S rRNA sequencing to characterize the cloacal microbiota in lorikeets (CZA n =  
91 67, DZ n = 24) over time. We compared the microbiota of healthy lorikeets, to lorikeets with  
92 enteritis, and lorikeets susceptible to enteritis, with “susceptible” being defined as healthy birds  
93 that subsequently developed enteritis. Based on sequencing data, culture, and toxin gene  
94 detection in intestinal contents, we identified *Clostridium perfringens* type A (CZA and DZ) and  
95 *C. colinum* (CZA only) at increased relative abundances in birds with enteritis. Histopathology  
96 and immunohistochemistry further identified the presence of gram-positive bacilli and *C.*  
97 *perfringens*, respectively, in the necrotizing intestinal lesions. Finally, using Random Forests and  
98 LASSO models, we identified several features (young age and the presence of *Rhodococcus*  
99 *fascians* and *Pseudomonas umsongensis*) associated with susceptibility to clostridial enteritis.

### 100 *Conclusions*

101 We identified *C. perfringens* type A and *C. colinum* associated with lorikeet necrohemorrhagic  
102 enteritis at CZA and DZ. Susceptibility testing of isolates lead to an updated clinical treatment  
103 plan which ultimately resolved the outbreaks at both institutions. This work provides a  
104 foundation for understanding gut microbiota features that are permissive to clostridial  
105 colonization and host factors (e.g. age, prior infection) that shape responses to infection.

106

### 107 **Keywords**

108 *Clostridium*, enteritis, lorikeets, gut microbiota, trypsin

### 109 **Background**

110 Enteritis is one of the most common causes of morbidity and mortality in captive and  
111 free-living lorikeets and lories, and outbreaks have been reported at multiple zoological  
112 institutions [1-5]. In an informal survey of 12 North American zoos that house 10 or more  
113 lorikeets, 11 of the 12 zoos reported a history of enteritis in their flocks, and 50% of the zoos  
114 reported recurrent outbreaks of enteritis (Junge, Hausmann, unpublished data). In at least five of  
115 these zoos, repeated cultures failed to identify an etiologic agent, and a combination of broad-  
116 spectrum antimicrobials were employed as empiric therapy. This approach increases the risk of  
117 promoting antimicrobial resistance [6]; moreover, in many cases, it also failed to resolve the  
118 outbreak or prevent recurrences of enteritis.

119 The microbiome is a collection of bacteria, Archaea, viruses, and microbial eukaryotes  
120 that live on or in hosts such as lorikeets. The microbiome is increasingly being realized as a  
121 source for biomarkers that predict disease and clinical outcomes [7-9] and serve as targets for  
122 therapeutics [10] (e.g. probiotics, prebiotics, phage therapy, dietary modification, microbiota  
123 transplants). Over the past decade, studies on human and animal microbiomes have increased  
124 exponentially [11], and we have learned that these microbial communities are critical to host  
125 health. The gut microbiome, for example, plays an important role in nutrient acquisition and  
126 metabolism [12], immune development [13], and pathogen defense [14, 15]. There are a growing  
127 number of studies on avian [16-18] and wildlife microbiota [19-21], and these studies are  
128 providing key insights into health and disease using minimally or non-invasive sampling  
129 techniques [22-25]. Microbiome studies are also being used to inform conservation efforts in  
130 wildlife species [26-28]. Recent research has further revealed that the gut microbiota influences  
131 susceptibility to enteropathogens. For example, *Clostridium*, *Campylobacter*, and *Salmonella*  
132 species, all of which are common agents in avian enteritis [1, 2, 5, 29-34], are adept at invading

133 dysbiotic (or already disrupted) microbial communities but not at colonizing healthy microbial  
134 communities [35-37].

135         In this study, we examined the microbiota over time in two lorikeet flocks (Columbus  
136 Zoo and Aquarium [CZA], Denver Zoo [DZ]) that experienced one or more outbreaks of  
137 enteritis. Between 2012 and 2018, the CZA lorikeet flock experienced repeated outbreaks of  
138 enteritis despite extensive efforts to resolve these issues through nutrition, sanitation, medication,  
139 and habitat and husbandry modifications [38]. In 2018, lorikeet morbidity and mortality events  
140 spiked, and necropsy reports consistently identified severe and necrotizing enteritis in these  
141 lorikeets, but bacterial cultures were frequently negative or variable (e.g. *Escherichia coli*,  
142 *Enterococcus spp.*). Around the same time, DZ was also managing an outbreak of enteritis in  
143 their lorikeet flock. We took a novel approach to lorikeet enteritis and sampled healthy and sick  
144 birds at CZA and DZ over 10 months. We hypothesized that a dysbiosis, or alteration in the gut  
145 microbial community, was making some lorikeets more susceptible to enteritis. Hence, our goal  
146 was to characterize this dysbiosis and determine if and what features predicted susceptibility.

147

## 148 **Results**

149

### 150 **Columbus Zoo and Aquarium lorikeet enteritis**

151 We sampled a total of 67 lorikeets at the CZA between November 2018 and September 2019.  
152 During this time, 34 lorikeets developed enteritis one or more times while the remaining birds (n  
153 = 33) never developed enteritis (**Table 1**). Birds with enteritis were identified through clinical  
154 signs (diarrhea, lethargic, fluffed). “Enteritis” samples collected from the same bird within two  
155 weeks of the initial enteritis sample were considered a single case. Enteritis samples collected

156 beyond 2 weeks from the initial sample in the same bird were counted as a second case of  
157 enteritis. There were no significant differences by sex in the number of lorikeets that did or did  
158 not develop enteritis ( $\chi^2 = 5.7$ ,  $p = 0.06$ ;  $\chi^2$  between males and females only, excluding  
159 “unknown” = 0.12,  $p = 0.73$ ). However, there was a significant difference by age ( $\chi^2 = 9.7$ ,  $p =$   
160 0.02) and by species ( $\chi^2$  with all species = 7.2,  $p = 0.07$ ;  $\chi^2$  between rainbow and coconut  
161 lorikeets only (the two dominant species in this flock) = 6,  $p = 0.01$ ), with enteritis occurring  
162 more in younger birds (< 2 years old) and in coconut lorikeets. Birds that survived a previous  
163 episode of enteritis also had a 2.2 times increased risk of developing future enteritis; although,  
164 this was only marginally significant [95% CI: 0.99-5.29;  $p=0.051$ ]. We also observed an increase  
165 in enteritis cases between December 2018 and March 2019 (**Fig. 1a**).

166

### 167 **Gut microbiota by demographics and season**

168 We did not observe significant differences in microbial composition or diversity (Shannon,  
169 Observed Features) by sex or species; although, by age, some differences in composition were  
170 detected via the Unweighted, but not the Weighted UniFrac metric (**Additional File 4**, alpha-  
171 diversity, all Kruskal-Wallis  $p > 0.05$ ; **Additional File 5**). There were also significant differences  
172 in microbial composition and diversity by season (November 2018, February 2019, September  
173 2019) with diversity declining significantly over time (**Fig. 1b,c**, Weighted UniFrac,  
174 PERMANOVA  $p = 0.001$ ; Observed Features Kruskal-Wallis, all  $p < 0.001$ , **Additional File 6**).

175

### 176 **Gut microbiota changes with enteritis**

177 As compared to healthy lorikeets, we observed a significant decrease in microbial diversity and  
178 altered microbial composition in lorikeets with enteritis or lorikeets that died or were euthanized

179 as a result of enteritis (denoted “post-mortem” lorikeets) (**Fig. 2**, Observed Features Kruskal-  
180 Wallis all  $p < 0.0005$ , Weighted UniFrac PERMANOVA  $p = 0.001$ ; **Additional File 7**). The top  
181 differentially abundant microbe between healthy birds and birds with enteritis was *Clostridium*  
182 *perfringens*, which was significantly increased in lorikeets with enteritis (**Fig. 2c**; ANCOM  
183  $W=1098$ , no post-mortem birds included in this analysis). There were three other differentially  
184 abundant clostridia, including *C. colinum*, *C. neonatale*, and *C. paraputrificum* which were also  
185 all increased in birds with enteritis (**Additional File 8**). We then performed this analysis on a  
186 subset of birds ( $n = 25$ ) for which we had matched samples at both healthy and enteritis time  
187 points and we again observed a significantly increased abundance of clostridia including *C.*  
188 *perfringens* and *C. neonatale* in these birds when they had enteritis (**Fig. 2c**, ANCOM  $W = 788$ ,  
189 **Additional File 9**).

190

### 191 **Culture, genotyping, and susceptibility testing**

192 After identifying clostridial DNA in our sequencing data, we employed anaerobic culture of  
193 lorikeet intestinal contents to look for the presence of viable clostridia in the gut. Intestinal  
194 content was collected from a total of 13 lorikeets that died or were euthanized due to enteritis.  
195 Contents were cultured on TSA agar with 5% sheep blood. All colonies with unique morphology  
196 were picked between 24 - 48 hours and underwent MALDI-TOF identification. We identified  
197 clostridia in 7 out of the 13 intestinal content samples including *C. perfringens* in 6 of these 7  
198 samples (**Table 2**). Other microbes that were identified in culture included: *Escherichia coli* (in 3  
199 out of 13 samples), and *C. paraputrificum* or *C. baratii*, *C. paraputrificum*, and *C. disporicum*  
200 each in 1 out of 13 samples. We did not culture *C. colinum* in any sample.

201



202 We then performed toxinotyping on the 6 *C. perfringens* isolates. All isolates contained the *cpa*  
203 gene (encoding alpha toxin) and were identified as *C. perfringens* type A. Five out of 6 isolates  
204 also contained the *cpb2* gene (encoding beta 2 toxin) (**Table 2**). Susceptibility testing was  
205 performed on 2 isolates. Both isolates were susceptible to metronidazole and penicillin, and one  
206 was also susceptible to clindamycin.

207

### 208 **Pathology of necrotizing enteritis**

209 We next evaluated the intestinal histopathology of lorikeets with enteritis to determine whether  
210 we could identify *C. perfringens* in intestinal lesions. To do this, we examined formalin-fixed  
211 paraffin-embedded (FFPE) blocks of lorikeet intestinal tissue from a total of 37 CZA lorikeets  
212 that were submitted to The Ohio State University College of Veterinary Medicine between 2015  
213 and 2019. Twenty-eight of these lorikeets had necrotizing enteritis while 7 died or were  
214 euthanized due to unrelated causes (encephalitis-2, trauma-1, non-enteric mycobacteriosis-2, air  
215 sacculitis-1, proventriculitis-1) (**Table 3**).

216

217 There were no significant differences by sex or species in the number of lorikeets that did or did  
218 not have enteritis (by sex: Freeman-Halton extension of Fisher's Exact Test  $p = 0.73$ ; between  
219 males and females only, excluding "unknown",  $p = 0.06$ ; by species: Fisher's Exact Test  $p =$   
220  $0.11$ ). There was also no significant difference in average age between birds with and without  
221 enteritis (Kruskal Wallis  $p = 0.13$ ); although, birds with enteritis were generally younger. We  
222 also examined the number of enteritis deaths by month and observed an increase in cases during  
223 summer (June-September) (**Fig. 3a**).

224

225 The majority of lorikeets had a clinical history of sudden weight loss, diarrhea, or sudden death.  
226 Most often, gross findings consisted of marked muscle wasting with a prominent keel (**Fig. 3b**),  
227 and multiple severely dilated loops of intestines with thin walls and scant or watery contents  
228 and/or gas (**Fig. 3c**). Other gross findings included tan opaque viscous coelomic fluid, intestinal  
229 segments impacted with friable dark red contents, and thickened tan mesentery with multiple  
230 small, white, firm to soft nodules within the intestines as well as on the serosa (**Fig. 3d**).  
231  
232 By histopathology, the most common finding (96 % of cases) was an intraluminal coagulum  
233 comprised of red blood cells, bacterial colonies and sloughed necrotic mucosa (**Fig 3e**).  
234 Approximately two thirds (64 %) of the cases had full thickness heterophilic and/or  
235 granulomatous enteritis with ulceration (**Fig 3f**). Approximately two thirds of the cases (61 %)   
236 had marked intestinal loop dilation, with over one third (39 %) having villous fusion and/or  
237 blunting. Thirty six percent had fibrosis within the intestinal wall, most often at sites of  
238 transmural inflammation and necrosis. The most commonly associated lesion was granulomatous  
239 and/or heterophilic coelomitis (86 %) with half of those cases having intracoelomic bacteria,  
240 most frequently bacilli or mixed bacteria. Other common lesions associated with necrotizing  
241 enteritis included mild to moderate renal tubular necrosis and/or mineralization most likely due  
242 to dehydration or septicemia (50 %) and marked extramedullary hematopoiesis within the liver  
243 (61 %). Evaluation of intestinal segments with modified Brown-Hopps Gram stain demonstrated  
244 mixed bacteria within the necrohemorrhagic coagulum and/or necroulcerative intestinal lesions.  
245 Eighty-nine percent of cases had large gram-positive bacilli present within the necrohemorrhagic  
246 coagulum and these gram-positive bacilli were also the most abundant bacteria present, followed  
247 by gram-positive cocci (71%), and gram-negative bacilli (54%) (**Fig. 3g**), whereas 57 % of the

248 transmural enteritis lesions contained large gram-positive bacilli, followed by 25 % with gram-  
249 positive cocci and 21 % with gram-negative bacilli.

250

251 There was a strong correlation between the histopathologic characterization of lesions as chronic  
252 versus acute with the clinical history of repeated versus first-time enteritis cases, respectively  
253 (Fisher's exact test,  $p=0.033$ ; Relative risk 2.95, 95% CI = [0.86 – 10.08]; Sensitivity 0.875, 95%  
254 CI = [0.62 – 0.98]). The chronicity of the lesions was assessed based on the presence of fibrosis  
255 and mononuclear inflammatory infiltrates. There was no association between chronicity and the  
256 presence of *C. perfringens* ( $\chi^2 = 0.0009$ ,  $p = 0.98$ ) or *C. colinum* ( $\chi^2 = 0.36$ ,  $p = 0.55$ ).

257

#### 258 ***Clostridium* identification and toxinotyping in FFPE lorikeet intestinal samples**

259 We then used immunohistochemistry (IHC) and an anti-*C. perfringens* antibody to determine  
260 whether the gram-positive bacilli present in intestinal lesions were *C. perfringens*. We identified  
261 *C. perfringens* in 22 out of the 28 (79%) enteritis-positive FFPE intestinal samples and in 1 out  
262 of 7 (14%) samples that had no enteritis (**Table 4, Fig. 3h,i,j**). PCR Toxinotyping of the FFPE  
263 intestinal tissue identified the *C. perfringens* alpha toxin gene (*cpa*) in 13 of the 28 (46%)  
264 enteritis-positive samples and 1 of the 7 (14%) samples with no enteritis lesions. No FFPE  
265 intestinal samples were positive for any of the following toxin genes: *cpb* (beta), *etx* (epsilon), *itx*  
266 (iota), *cpe* (enterotoxin), or *netB* (necrotic B-like). Additionally, although the gene encoding  
267 *cpb2* (beta-2 toxin) was identified in intestinal isolates, we did not find *cpb2* in the FFPE  
268 enteritis-positive samples (**Table 4**). *C. colinum* was identified by PCR in 18 of the 28 (84%)  
269 enteritis-positive intestines and 1 (14%) of the samples with no lesions.

270

## 271 **Denver Zoo lorikeet enteritis**

272 To determine whether *C. perfringens* could also be found in lorikeets with enteritis at other  
273 institutions, we collected cloacal swabs and intestinal content from lorikeets at the DZ between  
274 November 2018 and May 2019. We identified 12 birds that died or were euthanized due to  
275 enteritis, and sampled these birds at necropsy (“post-mortem”). These birds were then age-, sex-,  
276 and species-matched as closely as possible to 12 healthy lorikeets that were sampled during a  
277 flock survey in May 2019 when all birds were reported to be healthy (**Additional File 10**).  
278 Similar to the CZA lorikeets, we observed decreased microbial diversity and altered microbial  
279 composition in the post-mortem lorikeets with enteritis as compared to healthy birds (Observed  
280 Features Kruskal-Wallis  $p < 0.0005$ , Weighted UniFrac PERMANOVA  $p = 0.001$ , **Fig. 4**;  
281 **Additional File 11**). *C. perfringens* was also significantly increased in relative abundance in the  
282 post-mortem birds (**Fig. 4c,d**; ANCOM  $W = 67$ ). However, none of the DZ samples contained *C.*  
283 *colinum* 16S reads nor did they test positive for *C. colinum* via PCR. Type A *C. perfringens* was  
284 also cultured from eight of the DZ birds with enteritis.

285

## 286 **Susceptibility to clostridial enteritis**

287 *Odds and risk ratios associated with C. perfringens and C. colinum presence in healthy birds*

288 After identifying clostridial enteritis in two separate lorikeet flocks, we then used the CZA  
289 lorikeet data to explore factors that could be linked to susceptibility. First, we examined 16S  
290 rRNA reads for the presence of *C. perfringens* and *C. colinum* in healthy birds to determine  
291 whether they were predictors for developing future enteritis. Healthy CZA birds that had *C.*  
292 *perfringens* ( $n = 24$ , 36%) or *C. colinum* ( $n = 7$ , 11%) present in their gut were not at increased  
293 odds or risk of developing future enteritis (*C. perfringens*: OR = 0.59, 95% CI = [0.21-1.62],  $p =$

294 0.31; RR = 0.76, 95% CI = [0.44-1.32],  $p = 0.33$ ; *C. colinum*: OR = 1.37, 95% CI = [0.28-6.71],  
295  $p = 0.69$ ; RR = 1.16, 95% CI = [0.58-2.32],  $p = 0.67$  ). Notably, *C. perfringens* and *C. colinum*  
296 were only present at low relative abundances (<1%) in healthy birds, if present at all.

297

### 298 *Gut microbial composition and diversity of susceptible birds*

299 We then divided all healthy CZA birds into two groups: True Healthy and Susceptible. True  
300 Healthy birds remained healthy throughout the entire sampling period (Nov. 2018 - Sept. 2019)  
301 and never developed enteritis. Susceptible birds were healthy birds that went on to develop *C.*  
302 *perfringens* enteritis at least during the sampling period. We compared the microbial  
303 communities of these groups and observed significantly increased microbial diversity and altered  
304 microbial composition in Susceptible birds as compared to True Healthy birds or birds with  
305 enteritis (Observed Features Kruskal-Wallis  $p < 0.005$ , Weighted UniFrac PERMANOVA  $p =$   
306 0.001, **Fig. 5; Additional File 12**).

307

### 308 *Predicting susceptibility using Random Forests and LASSO models*

309 Next, we constructed Random Forests (RF) and LASSO models to compare True Healthy and  
310 Susceptible birds based on samples collected during the February 2019 CZA flock survey (all  
311 healthy birds). A total of 1503 microbial taxa (amplicon sequence variants - ASVs) were  
312 included in these models along with demographic variables including lorikeet age and species.  
313 Sex was not included as it was unknown for 31% of the birds. Seventy-five percent of the  
314 samples were used as a training set and 25% of the samples were used as a test set. The RF  
315 model identified the relative importance of variables as predictors (**Additional File 12,c**) while  
316 the LASSO model identified whether a variable was associated with susceptibility or true health

317 (Additional File 12,d). We then collated variables that were identified in both the RF and  
318 LASSO models (Fig. 5c). The top 26 variables included 23 taxa associated with Susceptible  
319 birds and 1 taxon (family Peptostreptococcaceae) associated with True Healthy birds. Rainbow  
320 lorikeets (as opposed to coconut lorikeets) were also associated with health while the  
321 “WasQuarantined TRUE” variable was associated with susceptibility. This variable represented  
322 young lorikeets (< 1 year old) that were transferred from another institution; these birds  
323 underwent an initial quarantine prior to integration with the CZA flock. Some of the taxa  
324 predictive of susceptibility included: *Rhodococcus fascians*, *Kocuria* spp., *Pseudomonas*  
325 *umsongensis*, two taxa in the family Enterobacteriaceae and an *Aeromonas* spp.

326

#### 327 *Dietary analysis for trypsin inhibitors*

328 Finally, we examined lorikeet diets in relation to *C. perfringens* susceptibility. Several *C.*  
329 *perfringens* toxins, including *cpa*, *cpb*, *pfo*, and *cpb2* (the toxin observed in 5 CZA *C.*  
330 *perfringens* isolates) are sensitive to the host-produced protease trypsin [39]. However, trypsin  
331 inhibitors present in the diet can block the activity of trypsin and thereby increase the risk of *C.*  
332 *perfringens* toxin-mediated enteritis. As lorikeets are nectivores and their main diet under human  
333 care consists of reconstituted powdered nectar, we opted to test trypsin inhibitor levels in six  
334 commercial nectar brands including brands used at CZA and DZ. The range of trypsin inhibition  
335 for the nectars was 0-1.79 trypsin inhibitor units (TIU)/mg dry nectar, denoting relatively low  
336 inhibition (Fig. 6). For reference, raw soybeans, which have been linked to *C. perfringens* toxin-  
337 mediated enteritis in poultry, contain approximately 46 TIU/mg, and soy protein concentrate  
338 contains 9.45 TIU/mg [40]. As such, the low levels of trypsin inhibition detected in commercial  
339 nectars are unlikely to be playing a major role in susceptibility to *C. perfringens* enteritis in

340 lorikeets; although we cannot rule out the possibility that other supplementary food items (e.g.  
341 sweet potatoes or legumes) may have contributed to toxin-mediated clostridial enteritis. Notably,  
342 *C. colinum* toxins have yet to be characterized; therefore, the role of trypsin and dietary trypsin  
343 inhibitors on *C. colinum* pathogenesis is unknown.

344

## 345 **Discussion**

346 Our initial goal in this study was to characterize the gut microbiota of sick and healthy lorikeets  
347 with the hypothesis that a dysbiosis was driving susceptibility to enteritis. While we did identify  
348 gut microbial alterations associated with susceptibility, we also ended up identifying the  
349 probable etiologic agents of enteritis in both the CZA and the DZ lorikeet flocks. Specifically,  
350 we observed increased relative abundances of *C. perfringens* and *C. colinum* (CZA lorikeets  
351 only) in the 16S rRNA sequencing data. We then cultured lorikeet intestinal contents and  
352 identified, genotyped, and susceptibility-tested multiple *C. perfringens* isolates. A  
353 histopathologic examination of intestinal tissues further revealed inflammation, necrosis, and  
354 ulcerative lesions that also contained gram-positive bacilli consistent with clostridial enteritis and  
355 specifically *C. colinum* or *C. perfringens*. IHC and toxinotyping of intestinal tissues confirmed  
356 the presence of *C. perfringens* in lorikeets with enteritis. PCR testing also confirmed the  
357 presence of *C. colinum* in CZA lorikeets with enteritis. We then compared the gut microbiota of  
358 healthy CZA lorikeets that developed enteritis to healthy CZA lorikeets that never developed  
359 enteritis during our 10-month sampling period, and we identified several features associated with  
360 susceptibility to enteritis including: age (younger birds are more susceptible), and increased  
361 relative abundances of *Rhodococcus fascians*, *Pseudomonas umsongensis*, two taxa in the family  
362 Enterobacteriaceae, and an *Aeromonas* spp., among others. This work allowed us to identify the

363 probable causative agents of lorikeet enteritis at two zoos, develop an optimal treatment plan  
364 based on genotyping and susceptibility testing, and profile healthy birds at high risk of clostridial  
365 enteritis.

366

### 367 **Demographics of lorikeet enteritis**

368 *C. perfringens* has been linked to enteritis in multiple mammal and bird species [34, 39, 41-44],  
369 including in lorikeets and other psittacines [5, 32, 33, 45-47]. In this study, young lorikeets (< 2  
370 years old) were more likely to develop clostridial enteritis. We also observed some differences in  
371 microbial composition by age (**Additional File 5**), and age emerged as a predictor of  
372 susceptibility in the Random Forests model (**Additional File 12,c**). Previous reports in other  
373 avian species note that the immunological naivete of young birds may increase susceptibility to  
374 *C. perfringens* while adult birds are more resistant [48, 49]. We also found that coconut lorikeets  
375 were more likely to develop enteritis as compared to other lorikeet species. It is less clear what  
376 may be driving species differences in clostridial enteritis; although, there were more coconut  
377 lorikeets than any other species at CZA, and *C. perfringens* has been associated with necrotic  
378 enteritis in coconut lorikeets at other institutions [47]. While type A was the dominant *C.*  
379 *perfringens* toxinotype reported in the previous study on lorikeets, toxinotype C was also  
380 common. Toxinotypes B, D, E, F, and G were also observed but less common [47]. Sex has also  
381 been reported as a factor that influences susceptibility to necrotic enteritis in birds [41]; although,  
382 we did not observe differences by sex in this study. Taken together, our results suggest that both  
383 microbial and immunological factors may contribute to clostridial enteritis in young lorikeets.

384

### 385 **Seasonal changes in healthy lorikeet gut microbiota**



386 We observed flock-wide shifts in gut microbiota between the three flock surveys in November  
387 2018, February 2019, and September 2019. In previous studies, seasonal alterations in avian  
388 microbiota have been linked to diet, migration, and breeding status [21, 50-52]. Lorikeets in the  
389 CZA flock have a consistent diet and environment year-round, and they do not migrate - thus  
390 mitigating these factors as drivers for the observed seasonal changes. While breeding status  
391 could be influencing these gut microbial alterations, it is also possible that flock-wide  
392 prophylactic antimicrobial use during enteritis outbreaks and between flock surveys drove these  
393 shifts. Notably, microbial diversity decreased significantly from November 2018 to September  
394 2019, which is a shift that could be consistent with antimicrobial use across host species  
395 including in birds [53-58].

396

#### 397 **Lorikeet enteritis: microbes to host**

398 Lorikeets with enteritis demonstrated microbial community shifts and histopathological changes  
399 as compared to healthy lorikeets. Based on 16S rRNA sequencing, culture, and genotyping, we  
400 confirmed the presence and increased relative abundance of *C. perfringens* type A in CZA and  
401 DZ lorikeets with enteritis. In the CZA lorikeets, we further determined that *C. perfringens* was  
402 directly associated with necroulcerative intestinal enteritis via IHC and multiple intestinal  
403 isolates of *C. perfringens* contained the *cpb2* toxin. *C. colinum* was also found at increased  
404 relative abundances in CZA but not DZ birds based on 16S sequences and PCR. In both CZA  
405 and DZ birds, we observed decreased microbial diversity and altered microbial composition in  
406 lorikeets with enteritis as compared to healthy lorikeets. *C. perfringens* and *C. colinum* have  
407 been implicated previously in necroulcerative enteritis in birds including lories, lorikeets, and  
408 poultry [47, 59-63]. Microbial community alterations have also been reported in chickens

409 infected with *C. perfringens* [64-67]. While several clostridial species are considered normal  
410 flora in some avian species including poultry, in psittacines, clostridial species are rarely found  
411 in the intestines of healthy birds, and taxa such as *C. colinum* and *C. perfringens* are considered  
412 pathogenic [4, 31, 59, 68, 69]. Previous studies have linked the *C. perfringens* beta-2 toxin  
413 (*cpb2*) identified in CZA birds with enteritis in psittacines [33], storks [70], pigs [71], and  
414 poultry [72]; however, the *cpb2* toxin has also been identified in healthy individuals (poultry,  
415 horses, dogs, and other avian species) and its role enteritis is not clear [73-77]. *C. colinum*-linked  
416 enteritis has only been reported in avian species, but virulence factors, toxins, and disease  
417 pathogenesis for *C. colinum* have yet to be fully elucidated [59].

418

419 Our results suggest that *C. perfringens* was the driver of enteritis in the DZ birds, while in the  
420 CZA birds, either *C. colinum*, or *C. perfringens*, or both acting synergistically, could have been  
421 driving the infections or creating a dysbiotic environment that allowed the other to thrive.  
422 Synergistic *C. perfringens* / *C. colinum* co-infections have been reported previously in poultry  
423 [78], while other clostridial co-infections (*C. perfringens* / *C. difficile*) have been reported in  
424 humans, foals, and dogs [79-81]. Phylogenetically related bacterial taxa can share functional  
425 traits and fill similar metabolic niches [82]; thus, it is feasible that an environment permissive to  
426 one type of clostridia may also be permissive to another clostridia.

427

### 428 **Susceptibility to enteritis**

429 Besides age, seasonality has also been linked to necrotic enteritis in birds. In poultry, enteritis  
430 cases occur more frequently in late winter and early spring [83-85], which is what we observed  
431 in the CZA lorikeets; although historically, CZA reported enteritis cases across all seasons. DZ

432 cases were also clustered during winter months, however this was the only occurrence of an  
433 enteritis outbreak DZ had experienced. Additionally, birds that had a history of enteritis were at  
434 2.2 times increased risk of developing future enteritis. Gross pathology and histopathology data  
435 further linked signs of chronic lesions (fibrosis, mucosal atrophy, villus blunting/fusion, wasting)  
436 to birds with repeated cases of enteritis. Repeated bouts of enteritis in some CZA lorikeets likely  
437 resulted in permanent intestinal damage that hindered absorption and peristalsis, leading to  
438 malnutrition and intestinal stasis, which are known risk factors for *C. perfringens* enteritis [61,  
439 86, 87]. While some lorikeets survived one or even 2 cases of enteritis, no bird lived beyond a  
440 third episode.

441

442 Diet – and specifically dietary trypsin inhibitors – can also be a risk factor for *C. perfringens*  
443 enteritis – depending on the toxinotype [45, 87, 88]. As such, we assessed trypsin inhibition in 6  
444 commercial nectars including the nectars used at CZA and DZ. All nectars contained very low  
445 levels of trypsin inhibitors and are unlikely to be contributing to enteritis incidence. However,  
446 supplementary diet items, such as cooked sweet potatoes, which were briefly part of the DZ  
447 lorikeet diet during the enteritis outbreaks, could potentially have contained higher levels of  
448 trypsin inhibitors. Notably, trypsin inhibitor levels vary widely across sweet potato cultivars [89-  
449 91], and we did not evaluate trypsin inhibition in any supplementary foods.

450

451 Finally, we examined microbial communities in healthy birds that later went on to develop  
452 enteritis (Susceptible) or remained healthy throughout the entire study period (True Healthy).  
453 Susceptible birds displayed minor but significant differences in microbial community diversity  
454 (Observed Features), composition, and differentially abundant taxa. These microbial community

455 differences could be linked to age as young birds were also the most susceptible. Although we  
456 found no significant difference in microbial diversity or composition in healthy lorikeets by age,  
457 birds in the youngest age group (< 2 years old) had the greatest microbial diversity (**Additional**  
458 **File 4, c,f)** which was also true in the Susceptible birds (**Fig. 5a**). Increased microbial diversity  
459 has also been observed in young chickens susceptible to *C. perfringens* infection as opposed to  
460 those that were more resistant [92]. Moreover, differences in microbial composition by age  
461 (Unweighted UniFrac, but not Weighted UniFrac) were significant in healthy birds ( $p = 0.01$   
462 **Additional File 5**). This suggests that age may influence lorikeet microbial community structure,  
463 and with a larger sample size, this may have been more apparent.

464

465 Whether shaped by age or not, the microbial community differences observed in Susceptible  
466 birds suggest that a lorikeet's pre-existing microbial community structure could potentially  
467 influence the ability of a clostridial pathogen (e.g. *C. perfringens* or *C. colinum*) to colonize the  
468 intestinal tract. This could be achieved through alterations in the metabolic environment that  
469 create a more favorable niche for clostridia to expand. The presence of primary bile acids, for  
470 example, can act as a germinant for *Clostridium* species, while the presence of secondary bile  
471 acids (produced by bacteria that convert primary to secondary bile acids), can inhibit *C.*  
472 *perfringens* proliferation [93, 94]. Minor alterations in pre-existing microbial community  
473 composition and differentially abundant microbes have also been reported in chickens  
474 susceptible to *C. perfringens* [92].

475

476 We identified several microbes that were associated with susceptibility including *Rhodococcus*  
477 *fascians*, *Pseudomonas umsongensis*, an *Aeromonas* spp., and two taxa in the family

478 Enterobacteriaceae. *Rhodococcus fascians* has been found at increased abundances in juvenile  
479 birds (sparrows, < 1 year old) as compared to older birds and could be an age-related taxa [21]. A  
480 single human case report also highlights a co-infection between *R. fascians* and a clostridial  
481 species (*C. difficile*) [95], which leads to the intriguing question as to whether these 2 species  
482 interact in ways that may support each other's growth. However, this co-infection was in an  
483 immunocompromised individual, so the relevance is unclear. Both *Pseudomonas* and *Aeromonas*  
484 species have been independently associated with enteritis in birds [86, 96, 97]. In a previous  
485 study that employed a subcutaneous abscess model, the addition of *Pseudomonas aeruginosa* or  
486 various Enterobacteriaceae species enhanced the growth of *C. perfringens* [98] suggesting that  
487 interactions between these taxa may indeed facilitate clostridial infections. Our RF and LASSO  
488 models also identified several other microbial taxa associated with susceptibility; although, the  
489 potential role these taxa may be playing in clostridial infections or enteritis is undetermined and  
490 requires additional study.

491  
492 This study had several limitations: We identified both *C. colinum* and/or Type A *C. perfringens*  
493 in lorikeets with enteritis; however, the mechanisms by which these bacteria caused disease  
494 remain unclear. For example, while *C. colinum* has been empirically and experimentally linked  
495 to ulcerative enteritis in birds, its virulence factors have yet to be elucidated [60]. Second,  
496 although both *C. perfringens* alpha toxin (*cpa*) and beta-2 toxin (*cpb2*) have been associated with  
497 enteritis in multiple host species including birds, the role of these toxins in enteritis pathogenesis  
498 is ambiguous, and both of these toxin genes have been found in the intestines of healthy animals  
499 [39, 60, 99]. It is possible that neither *cpa* nor *cpb2* are key virulence factors in Type A. *C.*  
500 *perfringens* and that other unidentified virulence factors played a role in lorikeet enteritis.

501 Additionally, toxin gene presence (e.g. PCR, used in this study) does not necessarily equate to  
502 toxin gene expression. However, clostridia and its respective toxin genes are considered aberrant  
503 in healthy psittacines [4, 31, 59, 68, 69], suggesting that they are playing a role in enteritis even  
504 if their virulence factors are not fully defined. The surrounding gut microbiota and metabolites  
505 could also be mediating *C. perfringens* pathogenesis including colonization and toxin expression  
506 as has been demonstrated in *Clostridiodes difficile* [35, 36]

507

## 508 **Conclusions**

509 In this study, we systematically examined gut microbiota and susceptibility to clostridial enteritis  
510 in two lorikeet flocks under human care. A few of our key take-aways: 1) Clostridia can be  
511 challenging to detect via culture in lorikeet cloacal swabs, but anaerobic culture of intestinal  
512 contents yielded *C. perfringens* in 6 out of 13 isolates from CZA, and 16S sequencing allowed  
513 ready identification of *C. perfringens* and *C. colinum* in birds with enteritis. As clostridia are not  
514 normal inhabitants in psittacines, this was a significant finding. 2) Clostridial isolates then  
515 underwent genotyping and susceptibility testing, which allowed us to update the lorikeets'  
516 clinical treatment plans to more targeted therapies, aligned with antimicrobial stewardship  
517 practices (DZ – metronidazole, CZA - florfenicol and clindamycin in clinically affected birds  
518 and prophylactic flock-wide application of bacitracin). Since June of 2019, and as of this  
519 writing, there have been no new cases of enteritis in lorikeets at either CZA or DZ. 3) Young age  
520 (potentially linked with immunological naivete, limited exposures, or lower trypsin activity  
521 [100]), prior enteritis, and specific microbes including *R. fascians*, *P. umsongensis*, and  
522 Enterobacteriaceae taxa are linked with susceptibility to enteritis, and these microbes could be  
523 promoting clostridial infections by establishing a niche conducive to colonization in a yet-to-be

524 determined manner. 4) Diet – including trypsin inhibitors – can also influence susceptibility to  
525 clostridial enteritis. Although, commercial nectars were low in trypsin inhibitors, we cannot rule  
526 out the possibility that other supplementary food items (e.g. sweet potatoes or legumes) could  
527 have contributed to toxin-mediated enteritis. Clostridial enteritis, and *C. perfringens* in  
528 particular, not only affects lorikeets, but can also cause devastating losses in the poultry industry  
529 (commonly Type G *C. perfringens* with NetB toxin), and lead to gastrointestinal disease in  
530 humans and other mammals – depending on the toxinotype. This work provides a foundation for  
531 understanding gut microbiota features that are permissive to clostridial colonization and host  
532 factors (e.g. age, prior infection) that shape responses to infection.

533

## 534 **Methods**

535

### 536 **Sample Collection – Columbus Zoo and Aquarium**

537 Cloacal swabs were obtained from all healthy lorikeets at the CZA (n=67 birds) during routine  
538 flock health surveys at 3 timepoints (November 2018, February 2019, September 2019) (See  
539 **Additional File 1, a** for experimental design). The flock was composed of four species of lorries  
540 and lorikeets including: rainbow lorikeets (*Trichoglossus moluccanus*), coconut lorikeets  
541 (*Trichoglossus haematodus*), marigold lorikeets (*Trichoglossus capistratus*), and lorys  
542 (*Trichoglossus*). Each bird was weighed and body condition scored during these surveys. Cloacal  
543 swabs, intestinal tissue, and/or intestinal contents were collected opportunistically from lorikeets  
544 (n = 34 birds) that presented with enteritis or died / were euthanized due to enteritis between  
545 November 2018 and September 2019.

546

547 A total of 246 samples were collected from birds at CZA – 172 samples from healthy birds and  
548 74 samples from birds with enteritis. Twenty-eight additional samples were also collected from  
549 the environment and included samples of freshly prepared nectar, water, fruit, and swabs of the  
550 aviary floor and perches. Swabs from live birds that presented with enteritis were collected prior  
551 to initiation of antimicrobial therapy and, in some cases, throughout treatment. For necropsies  
552 performed at CZA, intestinal contents were milked directly into a 2 ml screw-top tube without  
553 buffer. Swabs (Puritan, Guilford, ME) and intestinal contents were immediately transferred to a -  
554 80°C freezer and stored until sample processing.

555

#### 556 **Sample Collection – Denver Zoo**

557 Cloacal swabs were collected from the entire lorikeet flock during a flock survey in May 2019.  
558 At this time, all lorikeets were reported to be healthy. Cloacal swabs, intestinal tissue, and  
559 intestinal contents were collected opportunistically from lorikeets (n=12) that died or were  
560 euthanized due to enteritis between November 2018 and May 2019 (see **Additional File 1, b** for  
561 experimental design). These birds were then age-, sex-, and species-matched to 12 healthy  
562 lorikeets. Upon collection, all swabs and intestinal contents were immediately transferred to a -  
563 80°C freezer and stored until sample processing and DNA extraction.

564

#### 565 **DNA extraction, 16S rRNA amplification, and sequencing**

566 Bacterial DNA isolation from cloacal swabs and intestinal contents (approximately 200 mg) was  
567 performed using QIAamp PowerFecal DNA Kits (Qiagen, Venlo, Netherlands). For cloacal  
568 swabs, powerbeads and lysis buffer were added directly to the screw top tubes containing the  
569 swabs. A bead beating step (6 m/s for 40 sec.) was used to replace the vortex step from the



570 manufacturer's protocol. The remainder of the isolation was executed according to the protocol.  
571 DNA isolation from formalin-fixed paraffin-embedded (FFPE) intestinal tissues collected at  
572 necropsy was performed using the QIAamp DNA FFPE Tissue Kit following the manufacturer  
573 recommendations. Following DNA isolation, DNA concentration was measured using a Qubit  
574 Fluorometer 4 (Invitrogen, Carlsbad, CA, USA), and purity was assessed with a NanoDrop 1000  
575 Spectrophotometer (Thermo Scientific, Waltham, MA, USA). Samples were submitted for  
576 library preparation and sequencing at Argonne National Laboratory. Earth Microbiome Project  
577 primers 515F and 806R were used to amplify the V4 hypervariable region of the bacterial 16S  
578 rRNA gene. Amplicons were sequenced on an Illumina MiSeq in 2 x 250 paired-end mode.  
579

#### 580 **16S rRNA sequence processing**

581 The 16S rRNA sequences were processed, filtered, and analyzed using QIIME 2 version 2020.11  
582 [101] and DADA2 [102]. Taxonomic assignment of amplicon sequence variants (ASVs) was  
583 performed using the Greengenes 13\_8 database with 99% sequence identity cutoff. (Note: We  
584 also performed taxonomic assignment with SILVA 132 and found that, in this case, Greengenes  
585 provided more specific taxonomic assignments, particularly in the Clostridia taxa.) A total of 246  
586 samples from CZA and 30 samples from DZ were submitted for sequencing. Samples with fewer  
587 than 1000 reads were removed from analyses including 23 CZA samples and 6 DZ samples.  
588 This resulted in a total of 223 CZA samples and 24 DZ samples that were used in our analyses.  
589 After filtering, we obtained a total of 3,236,674 reads from the CZA samples (average: 13,911  
590 reads per sample; range: 1003 to 68,537 reads) and 264,769 reads from the DZ samples (average:  
591 9,026 reads per sample; range: 1922 to 26,766 reads). Sequences identified as mitochondria,  
592 chloroplasts, or eukaryotic reads were removed. Based on an examination of negative controls,

593 we also identified the following taxa as contaminants and removed them from analyses: a taxa in  
594 the order RF39 (Mollicutes phyla); a taxa in the genus *Allobaculum*, a taxa in the genus *Massilia*;  
595 *Haemophilus parainfluenzae*; *Prevotella copri*; a taxa in the genus *Sphingomonas*; a taxa in the  
596 genus *Bradyrhizobium*; *Pseudomonas viridiflava*; and a taxa in the genus *Thermicanus*.

597

### 598 **Culture, bacterial identification, and genotyping**

599 Lorikeet intestinal contents collected at necropsy were plated on reduced Trypticase Soy Agar  
600 (TSA II) with 5% sheep blood (BD BBL, Franklin Lakes, NJ) and incubated anaerobically (5%  
601 CO<sub>2</sub>, 5% H<sub>2</sub>, 90% N<sub>2</sub>) at 37°C until growth was seen (24 - 48 hours). As needed, bacteria was  
602 sub-cultured on *C. perfringens* selective agar, tryptose sulfite cycloserine (TSC), (Sigma Aldrich,  
603 St. Louis, MO). Bacterial colony identification was performed via Matrix Assisted Laser  
604 Desorption/Ionization Time-of-Flight Mass Spectrometry (MALDI-TOF). *C. perfringens* isolates  
605 were submitted for toxinotyping via multiplex PCR at the Ohio Department of Agriculture  
606 Animal Disease Diagnostic Laboratory (ODA ADDL). This PCR included primers for toxin  
607 types A – E (*cpa*, *cpb*, *cpb2*, *cpe*, *etx*, and *iota A*). The same primer sets and thermal cyclers  
608 parameters were used to analyze DNA extracted from FFPE tissues for comparison.

609

### 610 **CZA Lorikeets submitted to pathology**

611 Between 2015 - 2019, naturally deceased or humanely euthanized CZA lorikeets (due to severe  
612 clinical disease) underwent a complete macroscopic postmortem examination necropsied by  
613 veterinarians at the Columbus Zoo and Aquarium. Intestinal tracts were collected from lorikeets  
614 with enteritis (n=28) and with unremarkable intestines (n=7). Various organs, including the  
615 intestinal tracts, were placed in 10% neutral buffered formalin for fixation, stored at room

616 temperature, and submitted to The Ohio State University College of Veterinary Medicine for  
617 evaluation of the formalin fixed organs and histopathology.

618

### 619 **Histopathology**

620 Intestinal tracts, as well as other collected and formalin fixed tissues, were routinely trimmed,  
621 paraffin embedded, and stained with hematoxylin and eosin (H&E) for initial evaluation by the  
622 Comparative Pathology & Digital Imaging Shared Resource (CPDISR). Intestines were  
623 evaluated by two veterinary pathologists board-certified by the American College of Veterinary  
624 Pathologists (FU and MM) to characterize cases as necrotizing enteritis (n=28) vs  
625 control/unremarkable intestines (n=7). All sections with necrotizing enteritis were subsequently  
626 stained with the modified Brown-Hopps gram stain applied to identify and characterize  
627 intralesional bacteria, and a Masson's Trichrome stain to characterize chronicity of the lesions  
628 through the presence of fibrosis.

629

### 630 **Immunohistochemistry**

631 We then looked for the presence of *Clostridium perfringens* within intestinal sections from  
632 lorikeets with (n=28) or without enteritis (n=7) via immunohistochemistry (IHC) using a  
633 polyclonal rabbit anti-*Clostridium perfringens* antibody, OASA07164, Aviva Systems Biology,  
634 San Diego, CA). The IHC protocol is described in **Additional File 2**.

635

### 636 ***Clostridium perfringens* toxinotyping**

637 Toxinotyping on DNA extracted from FFPE lorikeet intestinal tissues was performed at the San  
638 Bernardino branch of the California Animal Health and Food Safety (CAHFS) Laboratory,

639 University of California-Davis, using a previously established method[47]. Additional testing for  
640 the *C. perfringens* alpha toxin (*cpa*) and beta-2 toxin (*cpb2*) was performed on CZA intestinal  
641 isolates at The Ohio State University using the following primers: *cpaF* (5'-  
642 GCTAATGTTACTGCCGTTGA -3'), *cpaR* (5'- CCTCTGATACATCG GTAAG -3'), *cpb2F*  
643 (5'- AGATTTTAAATATGATCCTAACC -3') and *cpb2R* (5'-  
644 CAATACCCTTCACCAAATACTC -3'). PCR conditions for *cpa* and *cpb2* testing were as  
645 follows: PCR was performed in a total volume of 25  $\mu$ L containing 0.75  $\mu$ L of each primer (0.3  
646  $\mu$ M), 2  $\mu$ L of extracted DNA, 12.5  $\mu$ L of HiFi Hot Start Master Mix (Kapa Biosystems) and 9  
647  $\mu$ L of nuclease-free water. Thermocycler profiles were as follows: 95 °C for 3 min, 45 cycles of  
648 95 °C for 30 s, 55 °C for 45 s, and 72 °C for 60 s, and a final extension step at 72 °C for 5 min.  
649 Positive controls included DNA extracted from known, toxin typed, *C. perfringens* isolates.

650

#### 651 ***Clostridium colinum* PCR**

652 PCR for *C. colinum* was also performed at CAHFS. Scrolls from (FFPE) sections of small  
653 intestine from the lorikeets were deparaffinized and the DNA extracted using a commercial kit  
654 (QIAamp DNA FFPE tissue kit; Qiagen) following the manufacturer's instructions. The  
655 extracted DNA was used as a template for PCR amplification of a ~192-bp fragment of the 16S  
656 rRNA gene of *C. colinum*, using the primers *CcolF* (5'- CGGCTGGATCACCTCCTTTC-3') and  
657 *CcolR* (5'-ACATTTTTGTCTGGCTCACGA-3'). PCR was performed in a total volume of 25  $\mu$ L  
658 containing 0.5  $\mu$ L of each primer (0.5  $\mu$ M), 3  $\mu$ L of extracted DNA, 7  $\mu$ L of nuclease-free water,  
659 and 14  $\mu$ L of Platinum™ II Hot-Start Green PCR Master Mix (2X) (Invitrogen). Thermocycler  
660 profiles were as follows: 95 °C for 7 min, 35 cycles of 95 °C for 60 s, 60 °C for 60 s, and 72 °C  
661 for 60 s, and a final extension step at 72 °C for 7 min. Samples were held at 4 °C. Positive

662 controls included DNA extracted from a commercial bacterial strain (ATCC 27770) and from  
663 FFPE sections of quail disease cases in which *C. colinum* had been isolated. DNA extracted from  
664 DZ samples also underwent *C. colinum* PCR.

665

#### 666 **Measurement of trypsin inhibitor levels in nectar**

667 We measured trypsin inhibitor levels in six commercial lorikeet feeds commonly used at  
668 zoological institutions and aviaries around North America, including at CZA and DZ. Lorikeet  
669 feeds included: Mazuri Softbill Diet for Iron-Sensitive Birds (Mazuri Exotic Animal Nutrition,  
670 St. Louis, MO), Blessing's Gourmet Blend Lory Nectar (Blessing's Pet Food Products, Murrieta,  
671 CA), Mazuri Lorikeet Diet (Formula: 5AB4, Mazuri Exotic Animal Nutrition, St. Louis, MO),  
672 Rainbow Landing Nectar (Berwick Productions, Inc. Escondido, CA), Roudybush Lory Nectar  
673 15 (Roudybush, Woodland, CA), and Higgins Intune Lory Food (Higgins Premium Pet Foods,  
674 Miami, FL).

675

#### 676 *Nectar preparation*

677 To eliminate assay interference due to free fatty acids, all nectars were first defatted through a  
678 hexane (Thermo Fisher Scientific, Waltham, MA) extraction. Nectars were combined with three  
679 times their volume of pure hexane and mixed for one minute. The samples were then allowed to  
680 sit for 10 minutes to allow for a separation of layers, and the top hexane-fat layer was removed.  
681 This process was repeated a total of three times for each nectar. Defatted nectars were then  
682 allowed to dry overnight in a fume hood. Once dry, 1 g of defatted nectar was added to 50 g of  
683 0.01M NaOH (Thermo Fisher Scientific, Waltham, MA). The mixture was stirred slowly on a

684 stir plate for 3 hours. Extracts were then centrifuged at 4696 x g, and the supernatant was  
685 decanted to produce the final extract.

686

### 687 *Trypsin inhibitor assay*

688 Trypsin inhibitor assays were carried out based on standard American Association of Cereal  
689 Chemists (AACC) methods [103], with modifications as proposed by Liu (2019) [40]. Reagent  
690 preparation is described in **Additional File 3**. Nectar solutions were diluted to various levels by  
691 combining 0 - 1 mL of nectar extract with enough deionized water to yield 2 mL total.  
692 Concentration ranges chosen were based upon preliminary trials, with the aim of yielding  
693 absorbance data points that fell in the range of 30 – 70 % inhibition. The 2 mL of diluted nectar  
694 were added to 15-mL centrifuge tubes and combined with 5 mL benzoyl-DL-arginine-p-  
695 nitroanilide hydrochloride (BAPA) solution. The mixture was incubated in a 37 °C water bath to  
696 bring it up to temperature, and then the assay reaction was initiated by adding 2 mL pre-warmed  
697 trypsin solution (0.02 mg trypsin/mL) to each tube. The tubes were allowed to react for exactly  
698 10 minutes at 37 °C, then the reaction was stopped with the addition of 1 mL 30 % acetic acid  
699 solution. Samples were allowed to cool to room temperature before measuring absorbance at 410  
700 nm with an HP 8453 UV-Vis spectrophotometer (Hewlett Packard, Palo Alto, CA). Absorbance  
701 readings were corrected with nectar blanks by mixing all reagents, but adding trypsin solution  
702 after the acetic acid to ensure the enzyme was inactive. A positive control sample was also made  
703 using 2 mL water in place of nectar and running the assay as delineated above.

704

### 705 *TIU calculation*

706 With the definition that 1 TIU = a decrease in 0.01 absorbance compared to a positive control  
707 sample, TIU/mg could be calculated as follows:

$$708 \quad \text{TIU} = (\text{positive control sample absorbance} - \text{nectar sample absorbance}) / 0.01$$

$$709 \quad \text{TIU/mg} = \text{TIU} / [\text{Nectar concentration(mg/mL)} \times 10 \text{ mL assay solution}]$$

710 To compare trypsin inhibitor concentrations (TIU/mg) between nectars, we applied a one-way  
711 ANOVA followed by pairwise Tukey's tests.

712

### 713 **Statistical analyses**

714 We compared the number of lorikeets that ever had enteritis versus the number of lorikeets that  
715 never developed enteritis by age, sex, and species using a  $\chi^2$  test [104]. In cases where groups  
716 had a frequency less than 5, we use the Yates'  $\chi^2$  correction. For cases in which a group  
717 contained zero individuals (e.g. 0 females), we used the Freeman-Halton extension of the  
718 Fisher's exact test. To compare average age across groups, we used a Kruskal-Wallis test after  
719 testing for normality using a Shapiro-Wilk test. For microbial community analyses, alpha  
720 diversity was compared between groups using observed features, the Shannon diversity metric,  
721 and the Kruskal-Wallis test. Beta diversity was evaluated using permutational multivariate  
722 analysis of variances (PERMANOVAs) between groups on Bray-Curtis distance matrices. All  
723 alpha and beta diversity  $p$ -values were corrected for multiple comparisons using the Benjamini  
724 Hochberg false discovery rate (FDR) correction. A  $p$ -value  $< 0.05$  was considered significant.  
725 Differential abundances of microbes by status (healthy, enteritis, susceptible) or season  
726 (November 2018, February 2019, September 2019) were tested using an ANCOM [105].  
727

728 Machine learning methods were used to assess susceptibility to enteritis based on microbial  
729 relative abundances and other demographic factors. Specifically, microbial composition was  
730 used in a supervised setting for classifying birds into True Healthy and Susceptible groups. True  
731 Healthy birds never developed enteritis throughout the sampling period (Nov. 2018 - Sept. 2019)  
732 while Susceptible birds developed enteritis at least once during this time. Random forests  
733 (RF)[106] and logistic regression with appropriate regularization (LASSO)[107, 108] were  
734 employed to differentiate these groups. The predictive accuracy was then assessed through cross-  
735 validation using an area under the receiver-operating characteristics curve (ROC).

736

### 737 **Declarations**

738 *Ethics approval and consent to participate*

739 IACUC approval through The Ohio State University (# 2019A00000028).

740 *Consent for publication*

741 Not applicable.

742 *Availability of data and material*

743 Sequencing data is available at NCBI Bioproject PRJNA722436.

744 *Competing Interests*

745 Not applicable.

746 *Funding*

747 Funding for this project provided by the following:

748 Columbus Zoo/Ohio State Cooperative Grants Program

749 National Institutes of Health Training Grant (T35)

750 The Ohio State University Infectious Diseases Institute



751 The Ohio State University College of Veterinary Medicine  
752 American Association of Zoo Veterinarians' Wild Animal Health Fund  
753 The Comparative Pathology & Digital Imaging Shared Resource is supported in part by grant  
754 P30 CA016058 from the National Cancer Institute, Bethesda, MD.

755

756 *Authors' contributions*

757 RJ and JH were involved in identification of the clinical syndrome, project conceptualization,  
758 sample collection, and clinical data.

759 DM, CM, and VH were involved in project development, DNA extraction, sequencing data  
760 analysis and interpretation, manuscript writing, and figure preparation.

761 VH also obtained project support and oversaw/managed the project and performed demographic  
762 / epidemiological analyses. RMrochak, RMadan, KS, and CM were involved in toxinotyping on  
763 intestinal isolates. ME was involved in sequencing data filtering and processing.

764 LG and SP were involved in Random Forests and LASSO analysis and interpretation, manuscript  
765 writing, and figure preparation. KF-K, MM, KLP, GB, and FU were involved in histopathology  
766 analysis, staining, and interpretation. MM and FU were also involved in manuscript writing and  
767 figure preparation. KF-K and MM were involved in gross pathology interpretation and figure  
768 preparation. FU performed histopathology, IHC analysis, interpretation, and figure preparation.

769 MN performed toxinotyping on FFPE blocks, *C. colinum* PCR, and was involved in manuscript  
770 writing and table preparation. WC, KS, and YV were involved in trypsin inhibitor testing and  
771 data interpretation. WC and YV were also involved manuscript writing and figure preparation.

772

773 *Acknowledgements*

774 We would like to acknowledge all of the keepers and veterinary staff at the Columbus Zoo and  
775 Aquarium and the Denver Zoo for facilitating sample collection and providing detailed health,  
776 medication, and dietary record. We also thank Dr. Michael Martinez for assistance with gross  
777 pathology photos, and we gratefully acknowledge Drs. Tamara Kruse and Helena Mendes-  
778 Soares for early discussions that shaped this project.

779

## 780 **Figure Legends**

781

782 **Figure 1. Seasonality in enteritis and gut microbiota in healthy lorikeets** a) Number of  
783 enteritis cases by month in Columbus Zoo and Aquarium lorikeets. Enteritis samples collected  
784 from the same bird within two weeks of the initial enteritis sample were considered a single case.  
785 Enteritis samples collected beyond 2 weeks from the initial sample in the same bird were  
786 counted as a second case of enteritis. Columbus Zoo & Aquarium healthy birds only: b)  
787 Microbial community composition (Weighted UniFrac) and c) diversity (Observed Features) by  
788 season (November 2018, February 2019, September 2019). There were significant shifts in  
789 microbial composition by season (PERMANOVA  $p = 0.001$ ), and microbial diversity decreased  
790 significantly between November 2018 and September 2019 (Kruskal-Wallis  $*p < 0.001$ ,  $**p <$   
791  $0.0001$ ). (Also see **Additional File 6**.)

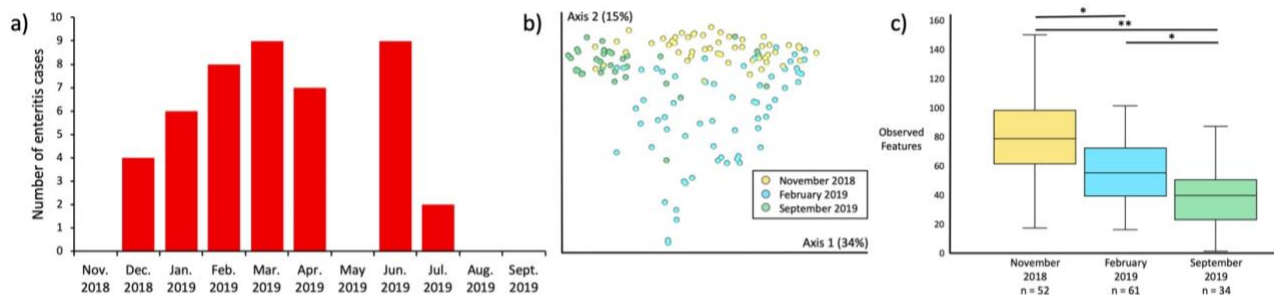

792

793

794 **Figure 2. Microbial community analysis in CZA lorikeets with enteritis.** Microbial  
795 composition and diversity in healthy lorikeets, lorikeets with enteritis, and lorikeets that died or  
796 were euthanized due to enteritis (postmortem). **a)** Microbial composition (Weighted UniFrac)  
797 was significantly altered (PERMANOVA  $p = 0.001$ ) and **b)** microbial diversity (Observed  
798 Features) was significantly decreased (Kruskal-Wallis  $*p < 0.0005$ ,  $**p < 1 \times 10^{-9}$ ) in lorikeets  
799 with enteritis or postmortem lorikeets. (Also see **Additional File 7.**) **c)** The relative abundance of  
800 *Clostridium perfringens* was significantly increased lorikeets with enteritis across all birds  
801 (ANCOM,  $W = 1098$ ) and across matched birds (ANCOM,  $W = 788$ ). “All birds” included  
802 samples from healthy birds that never got enteritis. “Matched birds” included only 25 birds that  
803 had both enteritis and healthy samples.

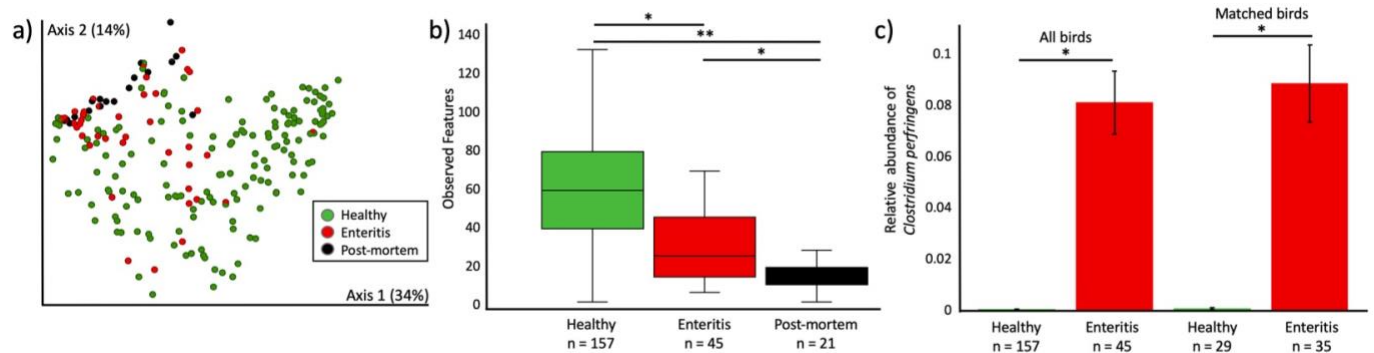

806 **Figure 3. Lorikeet enteritis gross and histopathology.** **a)** Number of lorikeet enteritis versus  
807 non-enteritis deaths by month. Cases from CZA were diagnosed histologically over a 5-year  
808 period (2015-2019). An increase in enteritis cases were observed during the summer months  
809 (June-September). (**b-d**) Gross necropsy findings typical of lorikeets with enteritis. **b)** The  
810 feathers have been plucked to demonstrate the decreased pectoral muscle mass of affected birds  
811 leading to a prominent keel. **c)** There are multiple severely dilated loops of intestines, including  
812 the paired ceca, with thin intestinal walls. Also present are segments of thickened and nodular

813 intestines mottled dark tan and pale tan. Tissues are formalin fixed. **d)** Formalin fixed loop of  
814 small intestine from an affected lorikeet. There are multiple soft to firm pale tan nodules within  
815 the wall and on the serosa of the intestines. The mesentery is also thickened by pale tan tissue  
816 and similar nodules. **(e-g)** Histologic findings from lorikeets with enteritis. **e)** Hematoxylin and  
817 eosin stain (H&E) of a chronic case of necrotizing enteritis in a lorikeet. Two loops of intestine  
818 are markedly dilated with thinning of the intestinal wall and replacement with fibrosis. The  
819 lumens are impacted with a coagulum of degenerate red blood cells, bacterial colonies and  
820 sloughed mucosa that often compress the remaining atrophied and blunted intestinal villi. There  
821 is also inflammation on the serosa and adjacent mesentery. **f)** H&E of acute transmural  
822 necrotizing and ulcerative enteritis in a lorikeet. The sparse remaining mucosa is characterized  
823 by a large central ulcer, inflammatory cells including macrophages and heterophils throughout  
824 the intestinal wall centered around the ulcer and overlying large colonies of bacteria. **g)** Modified  
825 Brown-Hopps of same intestinal section as in **Fig 3f**. The superficially adhered bacterial colonies  
826 within the lesion are monomorphic large gram-positive bacilli. **h)** H&E of necrotizing and  
827 ulcerative enteritis in a lorikeet. There is little remaining mucosa with a large central focus of  
828 ulceration, numerous heterophils and macrophages, followed by a layer of fibrin and degenerate  
829 red blood cells with admixed large bacterial colonies and sloughed necrotic mucosal epithelium.  
830 **i)** Immunohistochemistry (IHC) against *Clostridium perfringens* from the same intestinal section  
831 as in **Fig 3h**. Box indicates region in **Fig 3j** under higher magnification. **j)** IHC against *C.*  
832 *perfringens* within the indicated region from **Fig3i**. The light brown staining is non-specific  
833 labeling of the sloughed necrotic mucosa and hemorrhage. The punctate dark brown staining  
834 indicates immunolabeling of bacteria within the necrohemorrhagic coagulum and focus of  
835 ulceration.

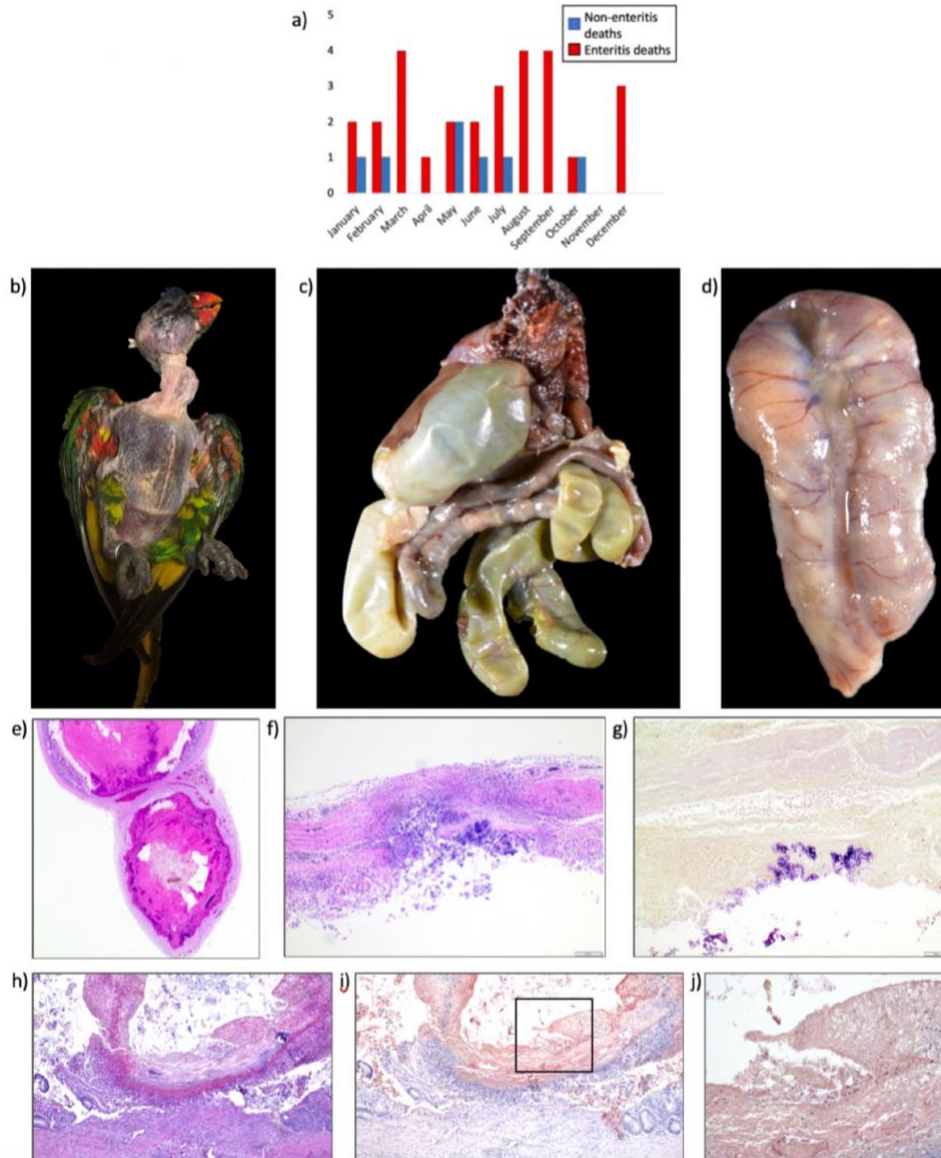

836

837

838 **Figure 4. Altered microbial community diversity and composition in Denver Zoo (DZ)**

839 **lorikeets with enteritis.** Microbial composition and diversity in healthy lorikeets and lorikeets

840 that died or were euthanized due to enteritis (“post-mortem” lorikeets). **a)** Microbial composition

841 (Weighted UniFrac) was significantly altered (PERMANOVA  $p = 0.001$ ) and **b)** microbial

842 diversity (Observed Features) was significantly decreased (Kruskal-Wallis  $*p < 0.0005$ ) in post-

843 mortem lorikeets. (Also see **Additional File 11.**) **c)** The relative abundance of *C. perfringens*

844 was also significantly increased in post-mortem lorikeets as compared to healthy lorikeets  
845 (ANCOM,  $W = 67$ ). **d**) Taxa bar plots showing taxonomic distributions within healthy and post-  
846 mortem lorikeets with enteritis. Post-mortem lorikeet microbial communities were dominated by  
847 *C. perfringens*.

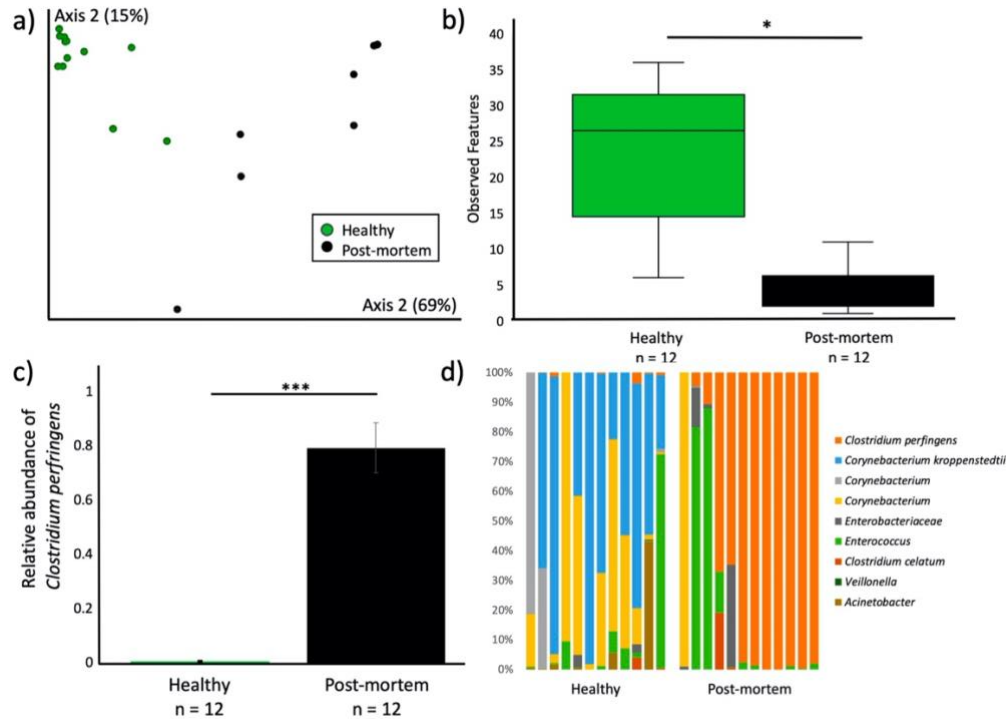

848

849

850 **Figure 5. Susceptible CZA lorikeets have increased microbial diversity and altered**  
851 **microbial composition that predicts enteritis.** Healthy lorikeets that never developed enteritis  
852 throughout the sampling period were identified as “True Healthy” while healthy birds that  
853 developed enteritis at least once during the sampling period were identified as “Susceptible.”  
854 “Enteritis” represents birds with enteritis that were sampled while they were clinically ill. No  
855 post-mortem samples are included in this figure. **a**) Microbial diversity (Observed Features,  
856 Kruskal-Wallis, all  $p < 0.005$ ) was increased and **b**) microbial composition was altered

857 (PERMANOVA  $p=0.001$ ) in Susceptible birds. c) Twenty-six variables including 24 microbial  
 858 taxa and two demographic variables were identified in Random Forests and LASSO models as  
 859 predictive of susceptibility or true health. The size of the bars represents the effect size of each  
 860 variable as predicted by the RF model. (Also see **Additional File 12.**)

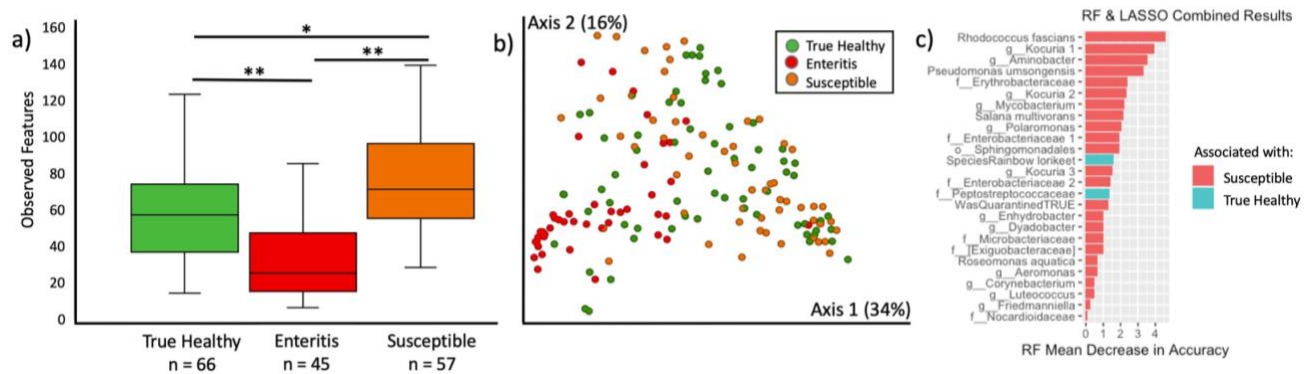

863 **Figure 6. Trypsin inhibitor measurements in commercial nectars.** Trypsin inhibitor units  
 864 (TIU) per milligram nectar were measured in 6 commercial nectars and concentrations were  
 865 compared using a one-way ANOVA and Tukey's Test ( $\alpha = 0.05$ ). Bars that share a letter are not  
 866 significantly different.

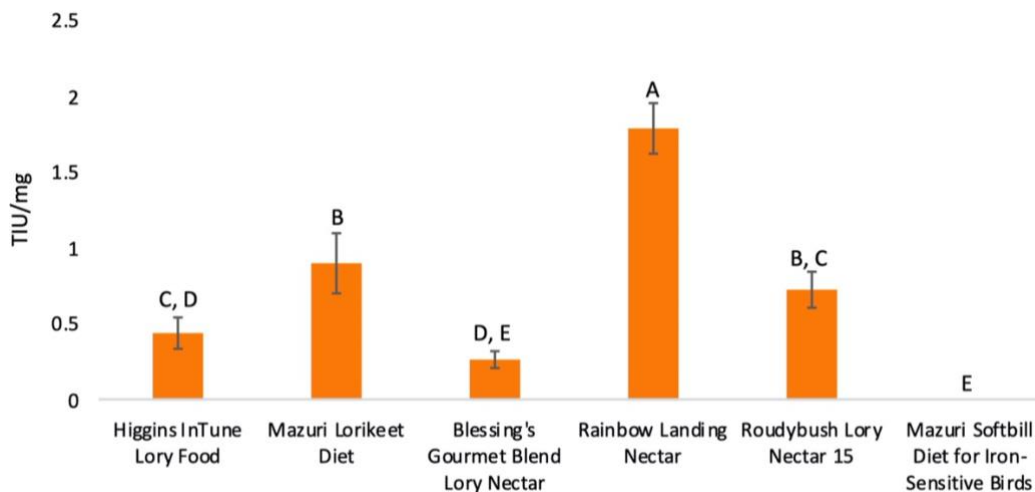

869 **Table Legends**

870

871 **Table 1. Columbus Zoo and Aquarium (CZA) Lorikeet Demographics.** Number and percent  
 872 of Columbus Zoo & Aquarium lorikeets that ever or never had enteritis between Nov. 2018 and  
 873 Sept. 2019 by sex, age, and lorikeet species.

**Table 1. Columbus Zoo and Aquarium (CZA) Lorikeet Demographics.**

|                       | Lorikeets that had<br><b>one or more<br/>episodes of<br/>enteritis between<br/>Nov. 2018-Sept.<br/>2019</b> | Lorikeets that<br><b>never had enteritis<br/>between<br/>Nov. 2018-Sept.<br/>2019</b> | <b>p-value</b>                                              |
|-----------------------|-------------------------------------------------------------------------------------------------------------|---------------------------------------------------------------------------------------|-------------------------------------------------------------|
| <b>Sex (n, %)</b>     |                                                                                                             |                                                                                       |                                                             |
| Male                  | 9 (13.4 %)                                                                                                  | 14 (20.9 %)                                                                           | p = 0.06 (all)<br>p = 0.73 (male<br>vs. female<br>only)     |
| Female                | 11 (16.4 %)                                                                                                 | 14 (20.9 %)                                                                           |                                                             |
| Unknown               | 14 (20.9 %)                                                                                                 | 5 (7.5 %)                                                                             |                                                             |
| <b>Age (n, %)</b>     |                                                                                                             |                                                                                       |                                                             |
| 0-2 years             | 19 (28.3%)                                                                                                  | 7 (10.4%)                                                                             | p = 0.02                                                    |
| 3-5 years             | 7 (10.4%)                                                                                                   | 16 (23.9 %)                                                                           |                                                             |
| 6-10 years            | 6 (9.0%)                                                                                                    | 6 (9.0%)                                                                              |                                                             |
| >11 years             | 2 (3.0 %)                                                                                                   | 4 (6.0 %)                                                                             |                                                             |
| <b>Species (n, %)</b> |                                                                                                             |                                                                                       |                                                             |
| Rainbow               | 8 (11.9 %)                                                                                                  | 17 (25.4 %)                                                                           | p = 0.07 (all)<br>p = 0.01<br>(rainbow vs.<br>coconut only) |
| Coconut               | 23 (34.3 %)                                                                                                 | 13 (19.4 %)                                                                           |                                                             |
| Marigold              | 1 (1.5 %)                                                                                                   | 0 (0 %)                                                                               |                                                             |
| Lory                  | 2 (3 %)                                                                                                     | 3 (4.5 %)                                                                             |                                                             |

874

875

876 **Table 2. Intestinal Content Isolates from CZA Lorikeets**



**Table 2. Intestinal content isolates from CZA lorikeets**

| Bird ID | Intestinal contents, growth in culture? | MALDI identification                                                                                                            | <i>cpa</i> (alpha toxin) | <i>cpb2</i> (beta2 toxin) | Inferred <i>C. perfringens</i> toxinotype | Selected for susceptibility testing? |
|---------|-----------------------------------------|---------------------------------------------------------------------------------------------------------------------------------|--------------------------|---------------------------|-------------------------------------------|--------------------------------------|
| 104073  | No                                      | None                                                                                                                            |                          |                           |                                           |                                      |
| 113096  | Yes                                     | <i>Clostridium perfringens</i> and <i>Clostridium disporicum</i>                                                                | +                        | +                         | A                                         |                                      |
| 115057  | No                                      | None                                                                                                                            |                          |                           |                                           |                                      |
| 115069  | Yes                                     | <i>Enterococcus faecium</i>                                                                                                     |                          |                           |                                           |                                      |
| 115094  | No                                      | None                                                                                                                            |                          |                           |                                           |                                      |
| 116046  | Yes                                     | <i>Escherichia coli</i>                                                                                                         |                          |                           |                                           |                                      |
| 118064  | Yes                                     | <i>Clostridium perfringens</i>                                                                                                  | +                        | +                         | A                                         |                                      |
| 118071  | Yes                                     | <i>Clostridium perfringens</i> , <i>Escherichia coli</i> , and <i>Clostridium paraperfringens</i> or <i>Clostridium baratii</i> | +                        | +                         | A                                         | yes                                  |
| 118075  | Yes                                     | <i>Clostridium perfringens</i>                                                                                                  | +                        | +                         | A                                         | yes                                  |
| 118089  | Yes                                     | <i>Clostridium perfringens</i> , <i>Escherichia coli</i> , an organism with no ID                                               | +                        | +                         | A                                         |                                      |
| 118115  | No                                      | None                                                                                                                            |                          |                           |                                           |                                      |
| 118118  | Yes                                     | <i>Clostridium perfringens</i> and <i>Clostridium disporicum</i>                                                                | +                        | -                         | A                                         |                                      |
| 118119  | Yes                                     | <i>Clostridium paraputrificum</i>                                                                                               |                          |                           |                                           |                                      |

877

878

879 **Table 3. Lorikeet Demographics for CZA lorikeets submitted to pathology.** The Freeman-  
 880 Halton extension of the Fisher's Exact test was used to calculate p-values for sex and species. A  
 881 Kruskal-Wallis test was used to calculate the p-value for age.

**Table 3. Lorikeet Demographics for CZA lorikeets submitted to pathology**

|                                       | Lorikeets with enteritis | Lorikeets with no enteritis | p-value                |
|---------------------------------------|--------------------------|-----------------------------|------------------------|
| <b>Sex (n, %)</b>                     |                          |                             | $p = 0.73$ (all)       |
| Male                                  | 12 (34.3%)               | 5 (14.3%)                   | $p = 0.06$             |
| Female                                | 12 (34.3%)               | 0 (0%)                      | (male vs. female only) |
| Unknown                               | 4 (11.4%)                | 2 (5.7%)                    |                        |
| <b>Age (Mean <math>\pm</math> SD)</b> | 4.6 $\pm$ 4.7            | 9.3 $\pm$ 6.1               | $p = 0.13$             |
| <b>Species (n, %)</b>                 |                          |                             | $p = 0.11$             |
| Rainbow                               | 7 (20%)                  | 5 (14.2%)                   |                        |
| Coconut                               | 14 (40%)                 | 1 (2.9%)                    |                        |
| Other                                 | 7 (20%)                  | 1 (2.9%)                    |                        |

882

883

884 **Table 4. Toxin profiles, IHC, and *C. colinum* PCR on lorikeet intestines submitted to**  
 885 **pathology**

**Table 4. Toxin profiles, IHC, and *C. colinum* PCR on lorikeet intestines submitted to pathology**

| Sample ID | Age (yrs) | Sex | Species       | Acute / Chronic | Status     | <i>C. perfringens</i> IHC | <i>cpa</i> | <i>cpb</i> | <i>etx</i> | <i>itx</i> | <i>cpe</i> | <i>NetB</i> | <i>C. colinum</i> PCR |
|-----------|-----------|-----|---------------|-----------------|------------|---------------------------|------------|------------|------------|------------|------------|-------------|-----------------------|
| 15-1444   | 3         | F   | Rainbow       | acute           | enteritis  | +                         | -          | -          | -          | -          | -          | -           | +                     |
| 15-1455   | 14.7      | F   | Rainbow       | acute           | enteritis  | +                         | +          | -          | -          | -          | -          | -           | +                     |
| 15-1456   | 5.4       | M   | Coconut       | acute           | enteritis  | -                         | +          | -          | -          | -          | -          | -           | +                     |
| 15-1636   | 11        | M   | Rainbow       | acute           | enteritis  | +                         | -          | -          | -          | -          | -          | -           | +                     |
| 15-2050   | 0.8       | F   | Lorikeet      | acute           | enteritis  | -                         | -          | -          | -          | -          | -          | -           | -                     |
| 18-1004   | 0.8       | F   | Coconut       | acute           | enteritis  | +                         | +          | -          | -          | -          | -          | -           | +                     |
| 18-1304   | 6         | M   | Rainbow       | acute           | enteritis  | +                         | -          | -          | -          | -          | -          | -           | -                     |
| 18-1442   | 2         | M   | Rainbow       | acute           | enteritis  | +                         | +          | -          | -          | -          | -          | -           | +                     |
| 18-1698   | 15.5      | F   | Coconut       | acute           | enteritis  | +                         | +          | -          | -          | -          | -          | -           | +                     |
| 18-950    | 2.1       | F   | Lory          | acute           | enteritis  | +                         | -          | -          | -          | -          | -          | -           | -                     |
| 19-1164   | 1         | M   | Coconut       | acute           | enteritis  | -                         | -          | -          | -          | -          | -          | -           | +                     |
| 19-1220   | 1.3       | F   | Coconut       | acute           | enteritis  | +                         | +          | -          | -          | -          | -          | -           | -                     |
| 19-15     | 8.6       | F   | Coconut       | acute           | enteritis  | +                         | -          | -          | -          | -          | -          | -           | -                     |
| 19-183    | 0.8       | F   | Coconut       | acute           | enteritis  | +                         | +          | -          | -          | -          | -          | -           | -                     |
| 19-185    | 3.9       | F   | Coconut       | acute           | enteritis  | +                         | -          | -          | -          | -          | -          | -           | -                     |
| 19-427    | 0.6       | unk | Lorikeet      | acute           | enteritis  | +                         | +          | -          | -          | -          | -          | -           | +                     |
| 19-428    | 0.9       | unk | Coconut       | acute           | enteritis  | +                         | +          | -          | -          | -          | -          | -           | +                     |
| 19-488    | 15.6      | M   | Rainbow       | acute           | enteritis  | -                         | -          | -          | -          | -          | -          | -           | +                     |
| 19-526    | 1         | unk | Coconut       | acute           | enteritis  | no tissue                 | -          | -          | -          | -          | -          | -           | -                     |
| 15-1681   | 4.8       | M   | Coconut       | chronic         | enteritis  | +                         | +          | -          | -          | -          | -          | -           | +                     |
| 15-1834   | 8.9       | M   | Lorikeet      | chronic         | enteritis  | -                         | -          | -          | -          | -          | -          | -           | +                     |
| 16-82     | 7         | M   | Lorikeet      | chronic         | enteritis  | +                         | +          | -          | -          | -          | -          | -           | +                     |
| 18-1561   | 2.8       | M   | Violet necked | chronic         | enteritis  | +                         | -          | -          | -          | -          | -          | -           | +                     |
| 19-1241   | 1.3       | unk | Coconut       | chronic         | enteritis  | +                         | +          | -          | -          | -          | -          | -           | +                     |
| 19-1242   | 3         | F   | Marigold      | chronic         | enteritis  | +                         | +          | -          | -          | -          | -          | -           | -                     |
| 19-863    | 5         | M   | Rainbow       | chronic         | enteritis  | +                         | -          | -          | -          | -          | -          | -           | -                     |
| 15-1228   | 0.2       | M   | Coconut       | chronic active  | enteritis  | +                         | -          | -          | -          | -          | -          | -           | +                     |
| 15-1230   | 0.2       | F   | Coconut       | chronic active  | enteritis  | +                         | -          | -          | -          | -          | -          | -           | +                     |
| 15-1226   | 11        | M   | Rainbow       | NA              | No lesions | +                         | +          | -          | -          | -          | -          | -           | -                     |
| 16-426    | 0.2       | M   | Lorikeet      | NA              | No lesions | -                         | -          | -          | -          | -          | -          | -           | -                     |
| 16-653    | 1         | unk | Coconut       | NA              | No lesions | -                         | -          | -          | -          | -          | -          | -           | +                     |
| 17-150    | 12        | M   | Rainbow       | NA              | No lesions | -                         | -          | -          | -          | -          | -          | -           | -                     |
| 17-1689   | 13        | M   | Rainbow       | NA              | No lesions | -                         | -          | -          | -          | -          | -          | -           | -                     |
| 17-988    | 13        | unk | Rainbow       | NA              | No lesions | -                         | -          | -          | -          | -          | -          | -           | -                     |
| 19-1244   | 14.9      | M   | Rainbow       | NA              | No lesions | -                         | -          | -          | -          | -          | -          | -           | -                     |

886

887

888 **Additional Files**

889

890 **Additional File 1: Experimental design.** Lorikeet sampling by season and opportunistically  
 891 during cases of enteritis at the a) Columbus Zoo and Aquarium and the b) Denver Zoo.

892

893 **Additional File 2: *Clostridium perfringens* IHC protocol from California Animal Health &**  
894 **Food Safety Laboratory**

895

896 **Additional File 3: Reagent preparation for measurement of Trypsin Inhibitor Levels in**  
897 **nectar**

898

899 **Additional File 4: Microbial community diversity in healthy CZA birds by sex, species, and**  
900 **age.** Healthy birds across all time points: Microbial diversity (Shannon Diversity Index and  
901 Observed Features) did not differ significantly by **a,d** sex, **b,e** species, or **c,f** age (Kruskal  
902 Wallis: Shannon sex  $p = 0.77$ , species  $p = 0.25$ , age  $p = 0.89$ ; Observed Features sex  $p = 0.93$ ,  
903 species  $p = 0.18$ , age  $p = 0.08$ ).

904

905 **Additional File 5: CZA Microbial community composition by sex, species, and age.**

906

907 **Additional File 6: Seasonality in gut microbiota in healthy CZA lorikeets.** **a)** Microbial  
908 community composition (Unweighted UniFrac) and **b)** diversity (Shannon Diversity Index) by  
909 season (November 2018, February 2019, September 2019). There were significant shifts in  
910 microbial composition by season (PERMANOVA  $p = 0.001$ ), and microbial diversity decreased  
911 significantly between November 2018 and September 2019 (Kruskal-Wallis  $*p < 0.001$ ). (Also  
912 see **Fig. 1.**)

913

914 **Additional File 7: Altered microbial diversity and composition in CZA lorikeets with**  
915 **enteritis.** Microbial composition and diversity in healthy lorikeets, lorikeets with enteritis, and

916 lorikeets that died or were euthanized due to enteritis (post-mortem). **a)** Microbial composition  
917 (Unweighted UniFrac) was significantly altered (PERMANOVA  $p = 0.001$ ) and **b)** microbial  
918 diversity (Shannon Diversity Index) was significantly decreased (Kruskal-Wallis  $*p < 0.005$ ,  $**p$   
919  $< 0.0005$ ,  $***p < 0.00001$ ) in lorikeets with enteritis or post-mortem lorikeets. (Also see **Fig. 2.**)

920

921 **Additional File 8: Differentially abundant microbes by health status.** Based on an ANCOM,  
922 Clostridia were significantly increased in relative abundance in lorikeets with enteritis as  
923 compared to healthy lorikeets. This analysis included 157 healthy samples and 45 enteritis  
924 samples from a total of 67 birds. No post-mortem samples were included in this analysis.  
925 Clostridia are in **bold** text.

926

927 **Additional File 9: Differentially abundant microbes by health status in 25 birds with**  
928 **matched healthy / enteritis samples.** Based on an ANCOM, Clostridia were significantly  
929 increased in relative abundance in lorikeets with enteritis as compared to healthy lorikeets. This  
930 analysis included 29 healthy samples and 35 enteritis samples from a total of 25 birds. No post-  
931 mortem samples were included in this analysis. Clostridia are in **bold** text.

932

933 **Additional File 10: Denver Zoo (DZ) Lorikeet Demographics.** The p-value for sex were based  
934 on a  $\chi^2$  test. A Kruskal-Wallis test was used to calculate the p-value for age.

935 The Freeman-Halton extension of the Fisher's Exact test was used to calculate a p-value for  
936 species.

937

938 **Additional File 11: Altered microbial composition and diversity in Denver Zoo lorikeets**  
939 **with enteritis.** Microbial composition and diversity in healthy lorikeets and lorikeets that died or  
940 were euthanized due to enteritis (post-mortem). **a)** Microbial composition (Unweighted UniFrac)  
941 was significantly altered (PERMANOVA  $p = 0.001$ ) and **b)** microbial diversity was significantly  
942 decreased (Shannon, Kruskal-Wallis  $*p < 0.005$ ) in post-mortem lorikeets. (Also see **Fig. 4.**)

943

944 **Additional File 12: Susceptible CZA lorikeets have altered microbial composition that**  
945 **predicts enteritis.** Healthy lorikeets that never developed enteritis throughout the sampling  
946 period were identified as “True Healthy” while healthy birds that developed enteritis at least  
947 once during the sampling period were identified as “Susceptible.” “Enteritis” represents birds  
948 with enteritis that were sampled while they were clinically ill. No post-mortem samples are  
949 included in this figure. **a)** Microbial diversity (Shannon, Kruskal-Wallis,  $p < 0.005$ ) was  
950 increased in Susceptible and True Healthy birds as compared to birds with enteritis and **b)**  
951 microbial composition (Unweighted UniFrac) was altered in Susceptible birds. Variables  
952 associated with susceptibility or health were then predicted by a **c)** Random Forest (RF) or **d)**  
953 LASSO model. The RF model has a sensitivity of 0.75, a specificity of 0.571, and an overall  
954 accuracy of 0.557. This model identifies the relative importance of each variable but not whether  
955 the variable is associated with susceptibility or health. The LASSO model has a sensitivity of  
956 0.875, a specificity of 0.571, an overall accuracy of 0.733, and generates an area under the curve  
957 (AUC) of 0.72. This model (LASSO) identifies whether a variable is associated with  
958 susceptibility or health but not the relative importance of the variable.

959

960

961 **References**

- 962 1. Ward MP, Ramer JC, Proudfoot J, Garner MM, Juan-Sallés C, Wu CC: **Outbreak of**  
963 **Salmonellosis in a Zoologic Collection of Lorikeets and Lories (Trichoglossus,**  
964 **Lorius, and Eos spp.).** *Avian Diseases* 2003, **47**(2):493-498.
- 965 2. Shima AL, Osborn KG: **An Eporntic of Salmonella typhimurium in a Collection of**  
966 **Lories and Lorikeets.** *Journal of Zoo and Wildlife Medicine* 1989, **20**(3):373-376.
- 967 3. Mackie JT, Black D, Prior H: **Enteritis associated with adeno-virus-like particles in**  
968 **captive lorikeets.** *Australian Veterinary Journal* 2003, **81**(5):293-295.
- 969 4. Ferrell ST, Tell L: **Clostridium tertium Infection in a Rainbow Lorikeet**  
970 **(Trichoglossus haematodus haematodus) with Enteritis.** *Journal of Avian Medicine*  
971 *and Surgery* 2001, **15**(3):204-208.
- 972 5. Karunakaran N, Nagarajan K, Prathiba A, Soundararajan C, Bharathi SV: **Incidence,**  
973 **Diagnosis and Treatment of Clostridial Enteritis in Lories and Lorikeets.** *Intas*  
974 *Polivet* 2018, **19**:385+.
- 975 6. Melander RJ, Zurawski DV, Melander C: **Narrow-Spectrum Antibacterial Agents.**  
976 *Medchemcomm* 2018, **9**(1):12-21.
- 977 7. Sze MA, Schloss PD: **Leveraging Existing 16S rRNA Gene Surveys To Identify**  
978 **Reproducible Biomarkers in Individuals with Colorectal Tumors.** *mBio* 2018,  
979 **9**(3):e00630-00618.
- 980 8. Bhatt AP, Redinbo MR, Bultman SJ: **The role of the microbiome in cancer**  
981 **development and therapy.** *CA: a cancer journal for clinicians* 2017, **67**(4):326-344.
- 982 9. Wen C, Zheng Z, Shao T, Liu L, Xie Z, Le Chatelier E, He Z, Zhong W, Fan Y, Zhang L  
983 *et al*: **Quantitative metagenomics reveals unique gut microbiome biomarkers in**  
984 **ankylosing spondylitis.** *Genome Biology* 2017, **18**(1):142.
- 985 10. Lemon KP, Armitage GC, Relman DA, Fischbach MA: **Microbiota-Targeted**  
986 **Therapies: An Ecological Perspective.** *Science Translational Medicine* 2012,  
987 **4**(137):137rv135.
- 988 11. Young VB: **The role of the microbiome in human health and disease: an**  
989 **introduction for clinicians.** *BMJ* 2017, **356**:j831.
- 990 12. Hacquard S, Garrido-Oter R, González A, Spaepen S, Ackermann G, Lebeis S, McHardy  
991 Alice C, Dangl Jeffrey L, Knight R, Ley R *et al*: **Microbiota and Host Nutrition across**  
992 **Plant and Animal Kingdoms.** *Cell Host & Microbe* 2015, **17**(5):603-616.
- 993 13. Round JL, Mazmanian SK: **The gut microbiota shapes intestinal immune responses**  
994 **during health and disease.** *Nat Rev Immunol* 2009, **9**(5):313-323.
- 995 14. Kamada N, Chen GY, Inohara N, Núñez G: **Control of Pathogens and Pathobionts by**  
996 **the Gut Microbiota.** *Nature immunology* 2013, **14**(7):685-690.
- 997 15. Pickard JM, Zeng MY, Caruso R, Núñez G: **Gut microbiota: Role in pathogen**  
998 **colonization, immune responses, and inflammatory disease.** *Immunol Rev* 2017,  
999 **279**(1):70-89.
- 1000 16. Waite DW, Deines P, Taylor MW: **Gut Microbiome of the Critically Endangered New**  
1001 **Zealand Parrot, the Kakapo (Strigops habroptilus).** *PLOS ONE* 2012, **7**(4):e35803.
- 1002 17. Xenoulis PG, Gray PL, Brightsmith D, Palculict B, Hoppes S, Steiner JM, Tizard I,  
1003 Suchodolski JS: **Molecular characterization of the cloacal microbiota of wild and**  
1004 **captive parrots.** *Vet Microbiol* 2010, **146**:320-325.
- 1005 18. Ryu H, Grond K, Verheijen B, Elk M, Buehler DM, Santo Domingo JW: **IIntestinal**  
1006 **Microbiota and Species Diversity of Campylobacter and Helicobacter spp. in**

- 1007 **Migrating Shorebirds in Delaware Bay.** *Applied and Environmental Microbiology*  
1008 2014, **80**(6):1838.
- 1009 19. Hale VL, Tan CL, Niu K, Yang Y, Knight R, Zhang Q, Cui D, Amato KR: **Diet Versus**  
1010 **Phylogeny: a Comparison of Gut Microbiota in Captive Colobine Monkey Species.**  
1011 *Microbial Ecology* 2018, **75**(2):515-527.
- 1012 20. Bolnick DI, Snowberg LK, Hirsch PE, Lauber CL, Knight R, Caporaso JG, Svanbäck R:  
1013 **Individuals' diet diversity influences gut microbial diversity in two freshwater fish**  
1014 **(threespine stickleback and Eurasian perch).** *Ecology Letters* 2014, **17**(8):979-987.
- 1015 21. Escallón C, Belden LK, Moore IT: **The Cloacal Microbiome Changes with the**  
1016 **Breeding Season in a Wild Bird.** *Integrative Organismal Biology* 2019, **1**(1).
- 1017 22. Kueneman JG, Woodhams DC, Harris R, Archer HM, Knight R, McKenzie VJ:  
1018 **Probiotic treatment restores protection against lethal fungal infection lost during**  
1019 **amphibian captivity.** *Proceedings Biological sciences* 2016, **283**(1839):20161553.
- 1020 23. Amato KR, Metcalf JL, Song SJ, Hale VL, Clayton J, Ackermann G, Humphrey G, Niu  
1021 K, Cui D, Zhao H *et al*: **Using the gut microbiota as a novel tool for examining**  
1022 **colobine primate GI health.** *Global Ecology and Conservation* 2016, **7**:225-237.
- 1023 24. Avena CV, Parfrey LW, Leff JW, Archer HM, Frick WF, Langwig KE, Kilpatrick AM,  
1024 Powers KE, Foster JT, McKenzie VJ: **Deconstructing the Bat Skin Microbiome:**  
1025 **Influences of the Host and the Environment.** *Frontiers in Microbiology* 2016, **7**(1753).
- 1026 25. Kohl KD, Weiss RB, Cox J, Dale C, Denise Dearing M: **Gut microbes of mammalian**  
1027 **herbivores facilitate intake of plant toxins.** *Ecology Letters* 2014, **17**(10):1238-1246.
- 1028 26. Stumpf RM, Gomez A, Amato KR, Yeoman CJ, Polk JD, Wilson BA, Nelson KE, White  
1029 BA, Leigh SR: **Microbiomes, metagenomics, and primate conservation: New**  
1030 **strategies, tools, and applications.** *Biological Conservation* 2016, **199**:56-66.
- 1031 27. Clayton JB, Gomez A, Amato K, Knights D, Travis DA, Blekhnman R, Knight R, Leigh  
1032 S, Stumpf R, Wolf T *et al*: **The gut microbiome of nonhuman primates: Lessons in**  
1033 **ecology and evolution.** *American Journal of Primatology* 2018, **80**(6):e22867.
- 1034 28. West AG, Waite DW, Deines P, Bourne DG, Digby A, McKenzie VJ, Taylor MW: **The**  
1035 **microbiome in threatened species conservation.** *Biological Conservation* 2019,  
1036 **229**:85-98.
- 1037 29. Keyburn AL, Yan X-X, Bannam TL, Van Immerseel F, Rood JI, Moore RJ: **Association**  
1038 **between avian necrotic enteritis and Clostridium perfringens strains expressing**  
1039 **NetB toxin.** *Veterinary research* 2010, **41**(2):21-21.
- 1040 30. Shane S: **The significance of campylobacter jejuni infection in poultry: A review**  
1041 *Avian Pathology* 1992, **21**(2):189-213.
- 1042 31. Pisani J, Speer B, Howerth EW, Clubb SL: **Clostridial Infections in Psittacine Birds.**  
1043 *Journal of Avian Medicine and Surgery* 1998, **12**(3):202-204.
- 1044 32. O'Toole D, Mills K, Ellis R, Farr R, Davis M: **Clostridial Enteritis in Red Lorries (Eos**  
1045 **Bounea).** *Journal of Veterinary Diagnostic Investigation* 1993, **5**(1):111-113.
- 1046 33. Guimarães MB, Torres LN, Mesquita RG, Ampuero F, Cunha MPV, Ferreira TSP,  
1047 Ferreira AJP, Catão-Dias JL, Moreno AM, Knöbl T: **Clostridium perfringens Type A**  
1048 **Enteritis in Blue and Yellow Macaw (Ara ararauna).** *Avian Diseases* 2014, **58**(4):650-  
1049 653, 654.
- 1050 34. Asaoka Y, Yanai T, Hirayama H, Une Y, Saito E, Sakai H, Goryo M, Fukushi H, Masegi  
1051 T: **Fatal necrotic enteritis associated with Clostridium perfringens in wild crows**  
1052 **(Corvus macrorhynchos).** *Avian Pathology* 2004, **33**(1):19-24.

- 1053 35. Buffie CG, Bucci V, Stein RR, McKenney PT, Ling L, Gobourne A, No D, Liu H,  
1054 Kinnebrew M, Viale A *et al*: **Precision microbiome reconstitution restores bile acid**  
1055 **mediated resistance to *Clostridium difficile***. *Nature* 2015, **517**(7533):205-208.
- 1056 36. Battaglioli EJ, Hale VL, Chen J, Jeraldo P, Ruiz-Mojica C, Schmidt BA, Rekdal VM, Till  
1057 LM, Huq L, Smits SA *et al*: ***Clostridioides difficile* uses amino acids associated with**  
1058 **gut microbial dysbiosis in a subset of patients with diarrhea**. *Science Translational*  
1059 *Medicine* 2018, **10**(464).
- 1060 37. Ferreira RBR, Gill N, Willing BP, Antunes LCM, Russell SL, Croxen MA, Finlay BB:  
1061 **The intestinal microbiota plays a role in *Salmonella*-induced colitis independent of**  
1062 **pathogen colonization**. *PloS one* 2011, **6**(5):e20338-e20338.
- 1063 38. Gray KL: **After 14 lorikeets die, zoo hopes illness gone**. In: *Columbus Dispatch*. 2012.
- 1064 39. Uzal FA, Vidal JE, McClane BA, Gurjar AA: ***Clostridium Perfringens* Toxins**  
1065 **Involved in Mammalian Veterinary Diseases**. *Open Toxinology J* 2010, **2**:24-42.
- 1066 40. Liu K: **Soybean Trypsin Inhibitor Assay: Further Improvement of the Standard**  
1067 **Method Approved and Reapproved by American Oil Chemists' Society and**  
1068 **American Association of Cereal Chemists International**. *Journal of the American Oil*  
1069 *Chemists' Society* 2019, **96**(6):635-645.
- 1070 41. Droual R, Farver TB, Bickford AA: **Relationship of Sex, Age, and Concurrent**  
1071 **Intestinal Disease to Necrotic Enteritis in Turkeys**. *Avian Diseases* 1995, **39**(3):599-  
1072 605.
- 1073 42. Wobeser G, Rainnie DJ: **EPIZOOTIC NECROTIC ENTERITIS IN WILD GEESE**.  
1074 *Journal of Wildlife Diseases* 1987, **23**(3):376-385.
- 1075 43. Silva ROS, Lobato FCF: ***Clostridium perfringens*: A review of enteric diseases in**  
1076 **dogs, cats and wild animals**. *Anaerobe* 2015, **33**:14-17.
- 1077 44. Shivaprasad HL, Uzal F, Kokka R, Fisher DJ, McClane BA, Songer AG: **Ulcerative**  
1078 **Enteritis-Like Disease Associated with *Clostridium perfringens* Type A in Bobwhite**  
1079 **Quail (*Colinus virginianus*)**. *Avian Diseases* 2008, **52**(4):635-640.
- 1080 45. McOrist S, Reece RL: ***Clostridial* enteritis in free-living lorikeets (*Trichoglossus***  
1081 **spp.)**. *Avian Pathology* 1992, **21**(3):503-507.
- 1082 46. Rupiper DJ: **Hemorrhagic Enteritis in a Group of Great-Billed Parrots**  
1083 **(*Tanygnathus megalorhynchus*)**. *Journal of the Association of Avian Veterinarians* 1993,  
1084 **7**(4):209-211.
- 1085 47. Grau-Roma L, Navarro M, Blatter S, Wenker C, Kittl S, Uzal FA, Posthaus H:  
1086 ***Clostridium perfringens*–Associated Necrotic Enteritis-Like Disease in Coconut**  
1087 **Lorikeets (*Trichoglossus haematodus*)**. *Veterinary Pathology* 2021, **58**(2):423-427.
- 1088 48. Ritchie BW, Harrison GJ, Harrison LR: **Avian Medicine: Principles and Application**.  
1089 Lake Worth, FL: Wingers Publishing, Inc.; 1994.
- 1090 49. Bildfell RJ, Eltzroth EK, Songer JG: **Enteritis as a Cause of Mortality in the Western**  
1091 **Bluebird (*Sialia mexicana*)**. *Avian Diseases* 2001, **45**(3):760-763.
- 1092 50. Góngora E, Elliott KH, Whyte L: **Gut microbiome is affected by inter-sexual and**  
1093 **inter-seasonal variation in diet for thick-billed murres (*Uria lomvia*)**. *Scientific*  
1094 *Reports* 2021, **11**(1):1200.
- 1095 51. Drovetski SV, O'Mahoney MJV, Matterson KO, Schmidt BK, Graves GR: **Distinct**  
1096 **microbiotas of anatomical gut regions display idiosyncratic seasonal variation in an**  
1097 **avian folivore**. *Animal Microbiome* 2019, **1**(1):2.



- 1098 52. Lewis WB, Moore FR, Wang S: **Characterization of the gut microbiota of migratory**  
1099 **passerines during stopover along the northern coast of the Gulf of Mexico.** *Journal*  
1100 *of Avian Biology* 2016, **47**(5):659-668.
- 1101 53. Le Roy CI, Woodward MJ, Ellis RJ, La Ragione RM, Claus SP: **Antibiotic treatment**  
1102 **triggers gut dysbiosis and modulates metabolism in a chicken model of gastro-**  
1103 **intestinal infection.** *BMC Veterinary Research* 2019, **15**(1):37.
- 1104 54. Langdon A, Crook N, Dantas G: **The effects of antibiotics on the microbiome**  
1105 **throughout development and alternative approaches for therapeutic modulation.**  
1106 *Genome medicine* 2016, **8**(1):39-39.
- 1107 55. Dethlefsen L, Huse S, Sogin ML, Relman DA: **The Pervasive Effects of an Antibiotic**  
1108 **on the Human Gut Microbiota, as Revealed by Deep 16S rRNA Sequencing.** *PLOS*  
1109 *Biology* 2008, **6**(11):e280.
- 1110 56. Dethlefsen L, Relman DA: **Incomplete recovery and individualized responses of the**  
1111 **human distal gut microbiota to repeated antibiotic perturbation.** *Proc Natl Acad Sci*  
1112 2011, **108** (1):4554-4561.
- 1113 57. Modi SR, Collins JJ, Relman DA: **Antibiotics and the gut microbiota.** *J Clin Investig*  
1114 2014, **124**(10):4212-4218.
- 1115 58. Lu J, Hofacre C, Smith F, Lee MD: **Effects of feed additives on the development on**  
1116 **the ileal bacterial community of the broiler chicken.** *Animal* 2008, **2**(5):669-676.
- 1117 59. Uzal FA, Navarro MA, Li J, Freedman JC, Shrestha A, McClane BA: **Comparative**  
1118 **pathogenesis of enteric clostridial infections in humans and animals.** *Anaerobe* 2018,  
1119 **53**:11-20.
- 1120 60. Cooper KK, Songer JG, Uzal FA: **Diagnosing clostridial enteric disease in poultry.**  
1121 *Journal of Veterinary Diagnostic Investigation* 2013, **25**(3):314-327.
- 1122 61. Pattison M, McMullin P, Bradbury J, Alexander D (eds.): **Poultry Diseases (Chapter 18,**  
1123 **Clostridia)**, 6th edn: Saunders Ltd.; 2007.
- 1124 62. Altman RB, Clubb SL, Dorrestein GM, Quesenberry K (eds.): **Avian Medicine and**  
1125 **Surgery:** Saunders; 1997.
- 1126 63. Pizarro M, Höfle U, Rodríguez-Bertos A, González-Huecas M, Castaño M: **Ulcerative**  
1127 **Enteritis (Quail Disease) in Lories.** *Avian Diseases* 2005, **49**(4):606-608.
- 1128 64. Stanley D, Keyburn AL, Denman SE, Moore RJ: **Changes in the caecal microflora of**  
1129 **chickens following Clostridium perfringens challenge to induce necrotic enteritis.**  
1130 *Veterinary Microbiology* 2012, **159**(1):155-162.
- 1131 65. Lin Y, Xu S, Zeng D, Ni X, Zhou M, Zeng Y, Wang H, Zhou Y, Zhu H, Pan K *et al*:  
1132 **Disruption in the cecal microbiota of chickens challenged with Clostridium**  
1133 **perfringens and other factors was alleviated by Bacillus licheniformis**  
1134 **supplementation.** *PLOS ONE* 2017, **12**(8):e0182426.
- 1135 66. Antonissen G, Eeckhaut V, Van Driessche K, Onrust L, Haesebrouck F, Ducatelle R,  
1136 Moore RJ, Van Immerseel F: **Microbial shifts associated with necrotic enteritis.** *Avian*  
1137 *Pathology* 2016, **45**(3):308-312.
- 1138 67. Fasina YO, Newman MM, Stough JM, Liles MR: **Effect of Clostridium perfringens**  
1139 **infection and antibiotic administration on microbiota in the small intestine of**  
1140 **broiler chickens.** *Poultry Science* 2016, **95**(2):247-260.
- 1141 68. Hadley TL: **Disorders of the Psittacine Gastrointestinal Tract.** *Veterinary Clinics of*  
1142 *North America: Exotic Animal Practice* 2005, **8**(2):329-349.

- 1143 69. Wilson GH, Ritchie BW, Greenacre CB, Fontenot D: **Clostridium: Passenger or**  
1144 **pathogen?** In: *Annual Conference of the Association of Avian Veterinarians: 1999*. 251-  
1145 253.
- 1146 70. Boujon P, Henzi M, Penseyres JH, Belloy L: **Enterotoxaemia involving  $\beta$ 2-toxigenic**  
1147 **Clostridium perfringens in a white stork (*Ciconia ciconia*).** *Veterinary Record* 2005,  
1148 **156(23):746-747.**
- 1149 71. Garmory HS, Chanter N, French NP, Bueschel D, Songer JG, Titball RW: **Occurrence**  
1150 **of Clostridium perfringens beta2-toxin amongst animals, determined using**  
1151 **genotyping and subtyping PCR assays.** *Epidemiol Infect* 2000, **124(1):61-67.**
- 1152 72. Uzal FA, Songer JG, Prescott JF, Popoff MR (eds.): **Clostridial Diseases of Animals:**  
1153 John Wiley & Sons, Inc.; 2016.
- 1154 73. Silva ROS, Junior FCF, Marques MVR, Junior CAO, Martins NRD, Lobato FCF:  
1155 **Genotyping and antimicrobial susceptibility of Clostridium perfringens isolated**  
1156 **from Tinamidae, Cracidae and Ramphastidae species in Brazil.** *Ciência Rural* 2014,  
1157 **44(3):486-491.**
- 1158 74. Silva ROS, Ribeiro MG, Palhares MS, Borges AS, Maranhão RPA, Silva MX, Lucas  
1159 TM, Olivo G, Lobato FCF: **Detection of A/B toxin and isolation of Clostridium**  
1160 **difficile and Clostridium perfringens from foals.** *Equine Veterinary Journal* 2013,  
1161 **45(6):671-675.**
- 1162 75. Silva ROS, Santos RLR, Pires PS, Pereira LC, Pereira ST, Duarte MC, de Assis RA,  
1163 Lobato FCF: **Detection of toxins A/B and isolation of Clostridium difficile and**  
1164 **Clostridium perfringens from dogs in Minas Gerais, Brazil.** *Brazilian journal of*  
1165 *microbiology : [publication of the Brazilian Society for Microbiology]* 2013, **44(1):133-**  
1166 **137.**
- 1167 76. Schotte U, Truyen U, Neubauer H: **Significance of  $\beta$ 2-Toxigenic Clostridium**  
1168 **perfringens Infections in Animals and Their Predisposing Factors – A Review.**  
1169 *Journal of Veterinary Medicine, Series B* 2004, **51(10):423-426.**
- 1170 77. Crespo R, Fisher DJ, Shivaprasad HL, Fernández-Miyakawa ME, Uzal FA: **Toxinotypes**  
1171 **of Clostridium Perfringens Isolated from Sick and Healthy Avian Species.** *Journal of*  
1172 *Veterinary Diagnostic Investigation* 2007, **19(3):329-333.**
- 1173 78. Berto G, Agnoletti F, Drigo I, Tonon E, Vascellari M, Fracas V, Bano L: **Clostridial co-**  
1174 **infection episodes in commercial laying hens.** *Avian Pathology* 2015, **44(3):200-203.**
- 1175 79. Forero AJ, Muñoz M, Camargo M, Soto-De León SC, Ríos-Chaparro DI, Birchenall C,  
1176 Pinilla D, Pardo JM, Josa DF, Patarroyo MA *et al*: **High frequency of toxigenic**  
1177 **Clostridium difficile and Clostridium perfringens coinfection among diarrheic**  
1178 **patients at health care facility-onset (HCFO) and community-onset (CO) centers in**  
1179 **Bogotá, Colombia.** *Gut Pathogens* 2019, **11(1):27.**
- 1180 80. Uzal FA, Diab SS, Blanchard P, Moore J, Anthenill L, Shahriar F, Garcia JP, Songer JG:  
1181 **Clostridium perfringens type C and Clostridium difficile co-infection in foals.**  
1182 *Veterinary Microbiology* 2012, **156(3):395-402.**
- 1183 81. Diniz AN, Silva ROS, Oliveira Junior CA, Pierezan F, Lobato FCF: **Clostridium**  
1184 **perfringens type A netF and netE positive and Clostridium difficile co-infection in**  
1185 **two adult dogs.** *Anaerobe* 2016, **38:94-96.**
- 1186 82. Morrissey EM, Mau RL, Schwartz E, Caporaso JG, Dijkstra P, van Gestel N, Koch BJ,  
1187 Liu CM, Hayer M, McHugh TA *et al*: **Phylogenetic organization of bacterial activity.**  
1188 *The ISME Journal* 2016, **10(9):2336-2340.**

- 1189 83. Hermans PG, Morgan KL: **Prevalence and associated risk factors of necrotic enteritis**  
1190 **on broiler farms in the United Kingdom; a cross-sectional survey.** *Avian Pathology*  
1191 2007, **36**(1):43-51.
- 1192 84. Kaldhusdal M, Skjerve E: **Association between cereal contents in the diet and**  
1193 **incidence of necrotic enteritis in broiler chickens in Norway.** *Preventive Veterinary*  
1194 *Medicine* 1996, **28**(1):1-16.
- 1195 85. Fancher CA, Zhang L, Kiess AS, Adhikari PA, Dinh TTN, Sukumaran AT: **Avian**  
1196 **Pathogenic Escherichia coli and Clostridium perfringens: Challenges in No**  
1197 **Antibiotics Ever Broiler Production and Potential Solutions.** *Microorganisms* 2020,  
1198 **8**(10):1533.
- 1199 86. Gerlach H: **Bacteria.** In: *Avian Medicine: Principles and Applications.* Edited by Ritchie  
1200 B, Harrison G, Harrison L. Lake Worth, FL: Wingers Publishing, Inc.; 1994: 949-983.
- 1201 87. Gibert M, Jolivet-Renaud C, Popoff MR: **Beta2 toxin, a novel toxin produced by**  
1202 **Clostridium perfringens.** *Gene* 1997, **203**(1):65-73.
- 1203 88. Palliyeguru MWCD, Rose SP, Mackenzie AM: **Effect of trypsin inhibitor activity in**  
1204 **soya bean on growth performance, protein digestibility and incidence of sub-clinical**  
1205 **necrotic enteritis in broiler chicken flocks.** *British Poultry Science* 2011, **52**(3):359-  
1206 367.
- 1207 89. Bradbury JH, Hammer B, Tue N, Anders M, Millar JS: **Protein quantity and quality**  
1208 **and trypsin inhibitor content of sweet potato cultivars from the highlands of Papua**  
1209 **New Guinea.** *Journal of Agricultural and Food Chemistry* 1985, **33**(2):281-285.
- 1210 90. Zhang Z, Corke H: **Trypsin inhibitor activity in vegetative tissue of sweet potato**  
1211 **plants and its response to heat treatment.** *Journal of the Science of Food and*  
1212 *Agriculture* 2001, **81**(14):1358-1363.
- 1213 91. Senanayake SA, Ranaweera KKDS, Gunaratne A, Bamunuarachchi A: **Comparative**  
1214 **analysis of nutritional quality of five different cultivars of sweet potatoes (Ipomea**  
1215 **batatas (L) Lam) in Sri Lanka.** *Food Science & Nutrition* 2013, **1**(4):284-291.
- 1216 92. Lacey JA, Stanley D, Keyburn AL, Ford M, Chen H, Johanesen P, Lyras D, Moore RJ:  
1217 **Clostridium perfringens-mediated necrotic enteritis is not influenced by the pre-**  
1218 **existing microbiota but is promoted by large changes in the post-challenge**  
1219 **microbiota.** *Veterinary Microbiology* 2018, **227**:119-126.
- 1220 93. Kiu R, Hall LJ: **An update on the human and animal enteric pathogen Clostridium**  
1221 **perfringens.** *Emerg Microbes Infect* 2018, **7**(1):141-141.
- 1222 94. Sorg JA, Sonenshein AL: **Bile salts and glycine as cogerminants for Clostridium**  
1223 **difficile spores.** *Journal of bacteriology* 2008, **190**(7):2505-2512.
- 1224 95. Austin MC, Hallstrand TS, Hoogestraat DR, Balmforth G, Stephens K, Butler-Wu S,  
1225 Yeung CCS: **Rhodococcus fascians infection after haematopoietic cell**  
1226 **transplantation: not just a plant pathogen?** *JMM Case Rep* 2016, **3**(2):e005025-  
1227 e005025.
- 1228 96. Glünder G, Siegmann O: **Iccurrence of aeromonas hydrophila in wild birds.** *Avian*  
1229 *Pathology* 1989, **18**(4):685-695.
- 1230 97. França M, Walker RL, Kokka R, Shivaprasad HL: **Aeromonas Species Associated with**  
1231 **Necrotizing Enteritis and Septicemia in an Adult Male Ostrich (Struthio camelus).**  
1232 *Avian Diseases* 2009, **53**(2):310-316.
- 1233 98. Brook I, Walker RI: **Pathogenicity of Clostridium species with other bacteria in**  
1234 **mixed infections.** *Journal of Infection* 1986, **13**(3):245-253.

- 1235 99. Keyburn AL, Sheedy SA, Ford ME, Williamson MM, Awad MM, Rood JI, Moore RJ:  
1236 **Alpha-toxin of *Clostridium perfringens* is not an essential virulence factor in**  
1237 **necrotic enteritis in chickens.** *Infection and immunity* 2006, **74**(11):6496-6500.
- 1238 100. Brzęk P, Ciminari ME, Kohl KD, Lessner K, Karasov WH, Caviedes-Vidal E: **Effect of**  
1239 **age and diet composition on activity of pancreatic enzymes in birds.** *J Comp Physiol*  
1240 *B* 2013, **183**(5):685-697.
- 1241 101. Bolyen E, Rideout JR, Dillon MR, Bokulich NA, Abnet CC, Al-Ghalith GA, Alexander  
1242 H, Alm EJ, Arumugam M, Asnicar F *et al*: **Reproducible, interactive, scalable and**  
1243 **extensible microbiome data science using QIIME 2.** *Nature Biotechnology* 2019,  
1244 **37**(8):852-857.
- 1245 102. Callahan BJ, McMurdie PJ, Rosen MJ, Han AW, Johnson AJA, Holmes SP: **DADA2:**  
1246 **High-resolution sample inference from Illumina amplicon data.** *Nature methods*  
1247 2016, **13**(7):581-583.
- 1248 103. AACC: **AACC Method 22-40: Measurement of trypsin inhibitor activity of soy**  
1249 **products—spectrophotometric method**, 11th edn. St. Paul, MN: AACC International;  
1250 1999.
- 1251 104. Preacher KJ: **Calculation for the chi-square test: An interactive calculation tool for**  
1252 **chi-square tests of goodness of fit and independence** In.; 2001.
- 1253 105. Mandal S, Van Treuren W, White RA, Eggesbø M, Knight R, Peddada SD: **Analysis of**  
1254 **composition of microbiomes: a novel method for studying microbial composition.**  
1255 *Microb Ecol Health Dis* 2015, **26**:27663-27663.
- 1256 106. Breiman L: **Random Forests.** *Machine Learning* 2001, **45**(1):5-32.
- 1257 107. Tibshirani R: **Regression Shrinkage and Selection via the Lasso.** *Journal of the Royal*  
1258 *Statistical Society Series B (Methodological)* 1996, **58**(1):267-288.
- 1259 108. Efron B, Hastie T, Johnstone I, Tibshirani R: **Least angle regression.** *The Annals of*  
1260 *Statistics* 2004, **32**(2):407-499, 493.
- 1261
